# Supplementary material for: Screening Mangrove Endophytic Fungi for Antimalarial Natural Products
Source: PubMed Central journal article supplement (PMC3877901; doi:10.3390/md11125036), 2013-12-12

## Supplementary Information

- Figure S1.** Isolation scheme for **13** and **14**.
- Figure S2.**  $^1\text{H}$  NMR spectrum of **14** (500 MHz,  $\text{CDCl}_3$ ).
- Figure S3.**  $^{13}\text{C}$  NMR spectrum of **14** (125 MHz,  $\text{CDCl}_3$ ).
- Figure S4.** COSY spectrum of **14** (500 MHz,  $\text{CDCl}_3$ ).
- Figure S5.** HSQC spectrum of **14** (500 MHz,  $\text{CDCl}_3$ ).
- Figure S6.** HMBC spectrum of **14** (500 MHz,  $\text{CDCl}_3$ ).
- Figure S7.** ROESY spectrum of **14** (500 MHz,  $\text{CDCl}_3$ ).
- Figure S8.** Isolation scheme for **15** and **16**.
- Figure S9.**  $^1\text{H}$  NMR spectrum of **15** (500 MHz,  $\text{CDCl}_3$ ).
- Figure S10.**  $^{13}\text{C}$  NMR spectrum of **15** (125 MHz,  $\text{CDCl}_3$ ).
- Figure S11.** COSY spectrum of **15** (500 MHz,  $\text{CDCl}_3$ ).
- Figure S12.** HSQC spectrum of **15** (500 MHz,  $\text{CDCl}_3$ ).
- Figure S13.** HMBC spectrum of **15** (500 MHz,  $\text{CDCl}_3$ ).
- Figure S14.** Expansion of ROESY spectrum of **15**, 0–5 ppm (600 MHz,  $\text{CDCl}_3$ ).
- Figure S15.**  $^1\text{H}$  NMR spectrum of **16** (500 MHz,  $\text{CDCl}_3$ ).
- Figure S16.**  $^{13}\text{C}$  NMR spectrum of **16** (125 MHz,  $\text{CDCl}_3$ ).
- Figure S17.** COSY spectrum of **16** (500 MHz,  $\text{CDCl}_3$ ).
- Figure S18.** HSQC spectrum of **16** (500 MHz,  $\text{CDCl}_3$ ).
- Figure S19.** HMBC spectrum of **16** (500 MHz,  $\text{CDCl}_3$ ).
- Figure S20.** Expansion of ROESY spectrum of **16**, 1.0–5.0 ppm (600 MHz,  $\text{CDCl}_3$ ).
- Figure S21.** Isolation scheme for **18**.
- Figure S22.**  $^1\text{H}$  NMR spectrum of **18** (500 MHz,  $\text{CDCl}_3$ ).
- Figure S23.**  $^{13}\text{C}$  and DEPT NMR spectra of **18** (125 MHz,  $\text{CDCl}_3$ ).
- Figure S24.** COSY spectrum of **18** (500 MHz,  $\text{CDCl}_3$ ).
- Figure S25.** HSQC spectrum of **18** (500 MHz,  $\text{CDCl}_3$ ).
- Figure S26.** HMBC spectrum of **18** (500 MHz,  $\text{CDCl}_3$ ).

**Figure S1.** Isolation scheme for **13** and **14**. Red highlights indicate antimalarial activity.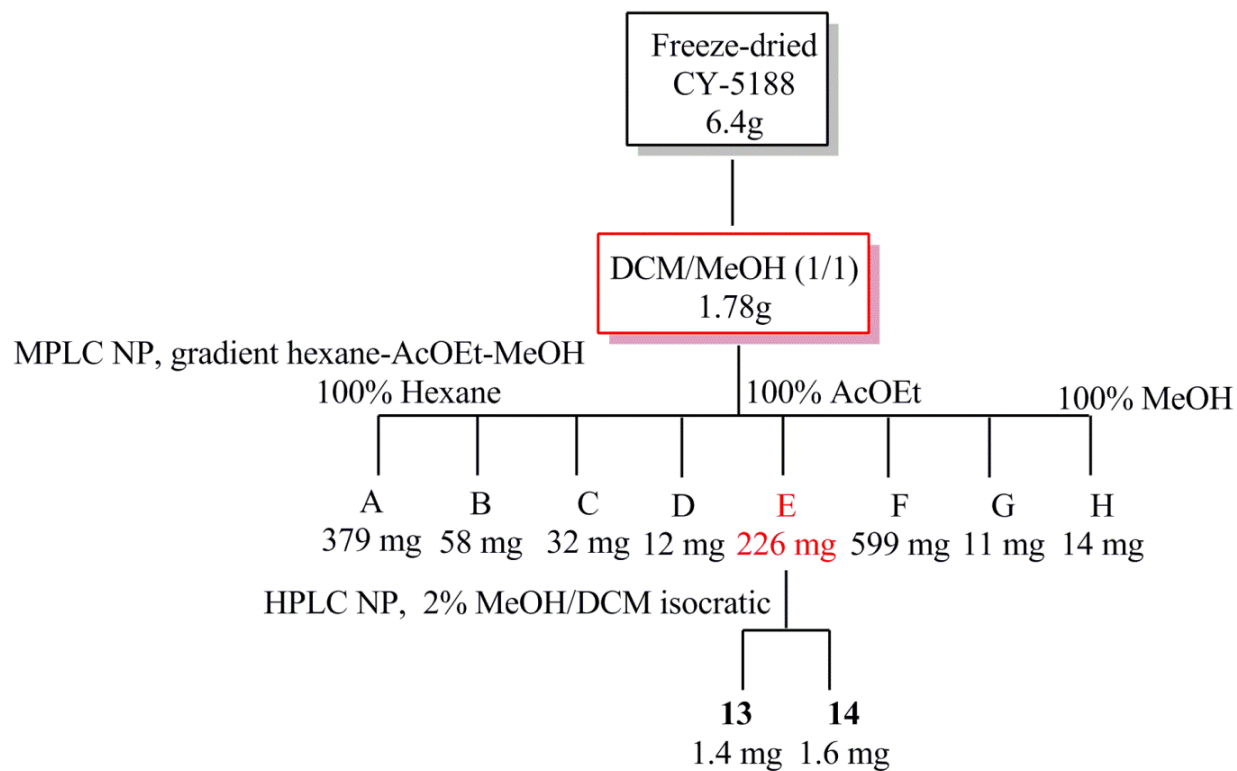

**Figure S2.**  $^1\text{H}$  NMR spectrum of **14** (500 MHz,  $\text{CDCl}_3$ ).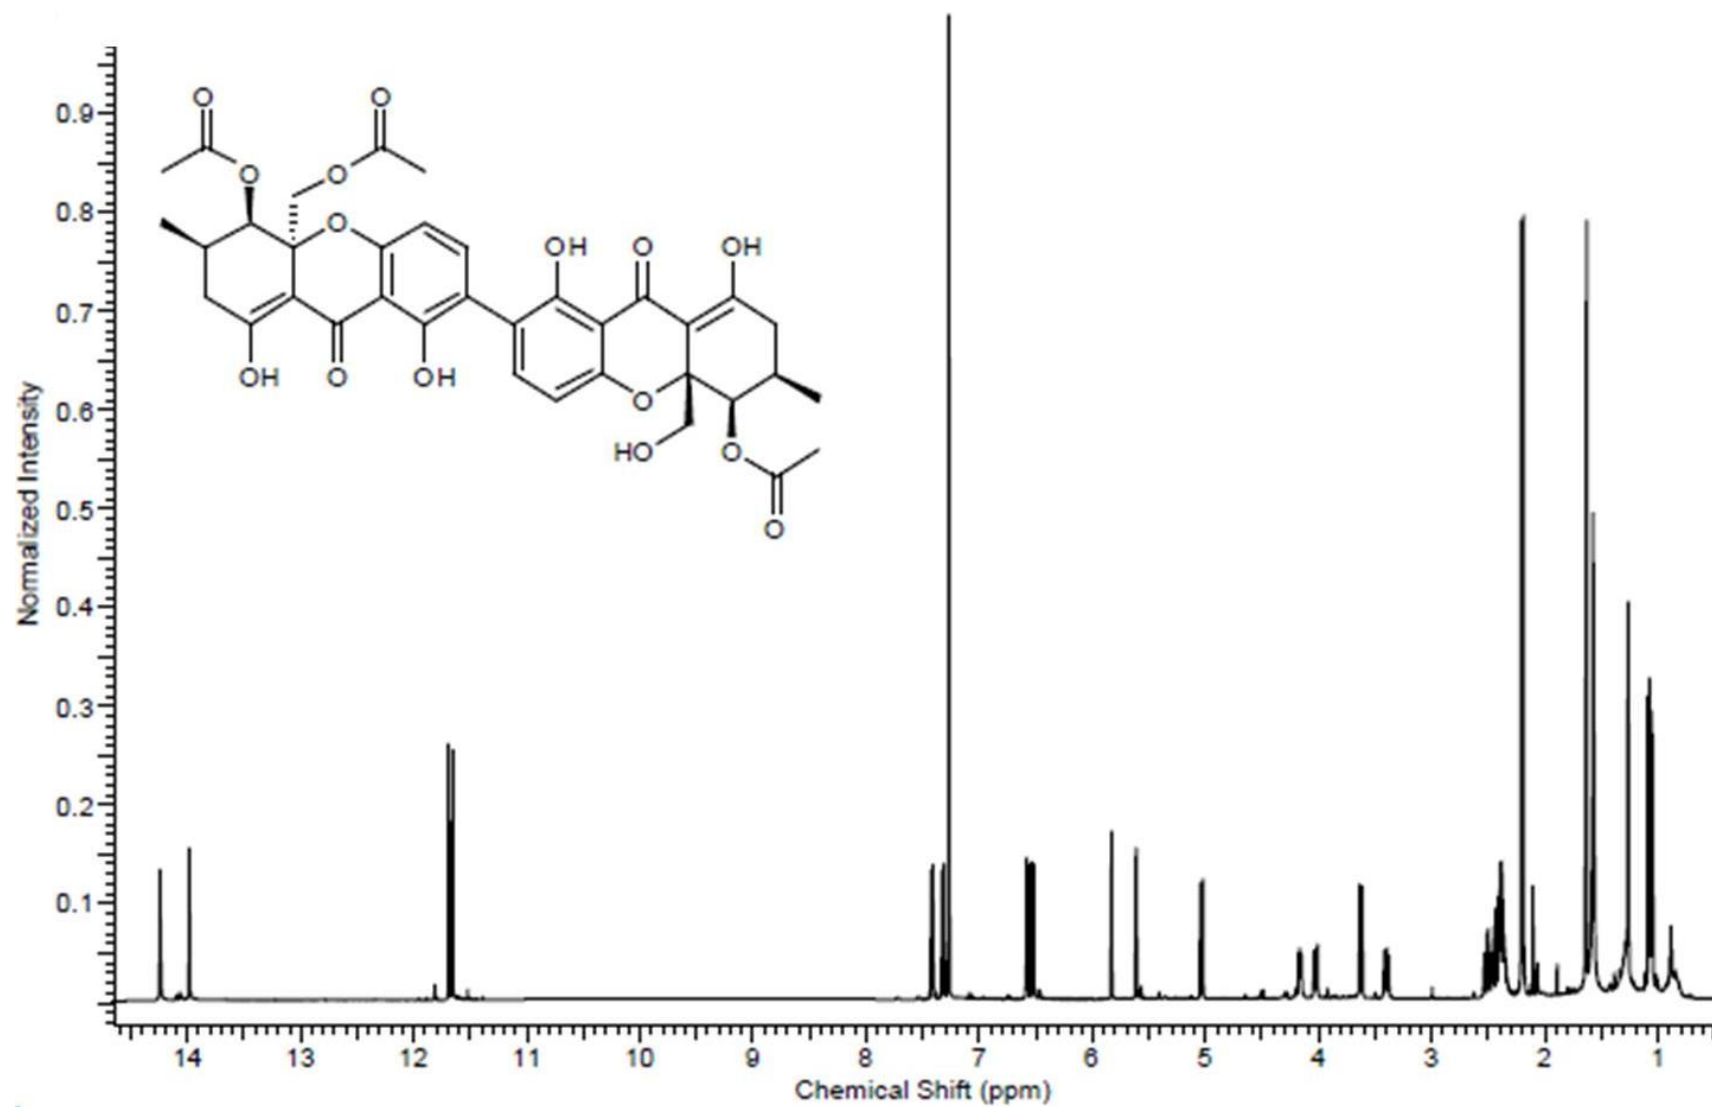

**Figure S3.**  $^{13}\text{C}$  NMR spectrum of **14** (125 MHz,  $\text{CDCl}_3$ ).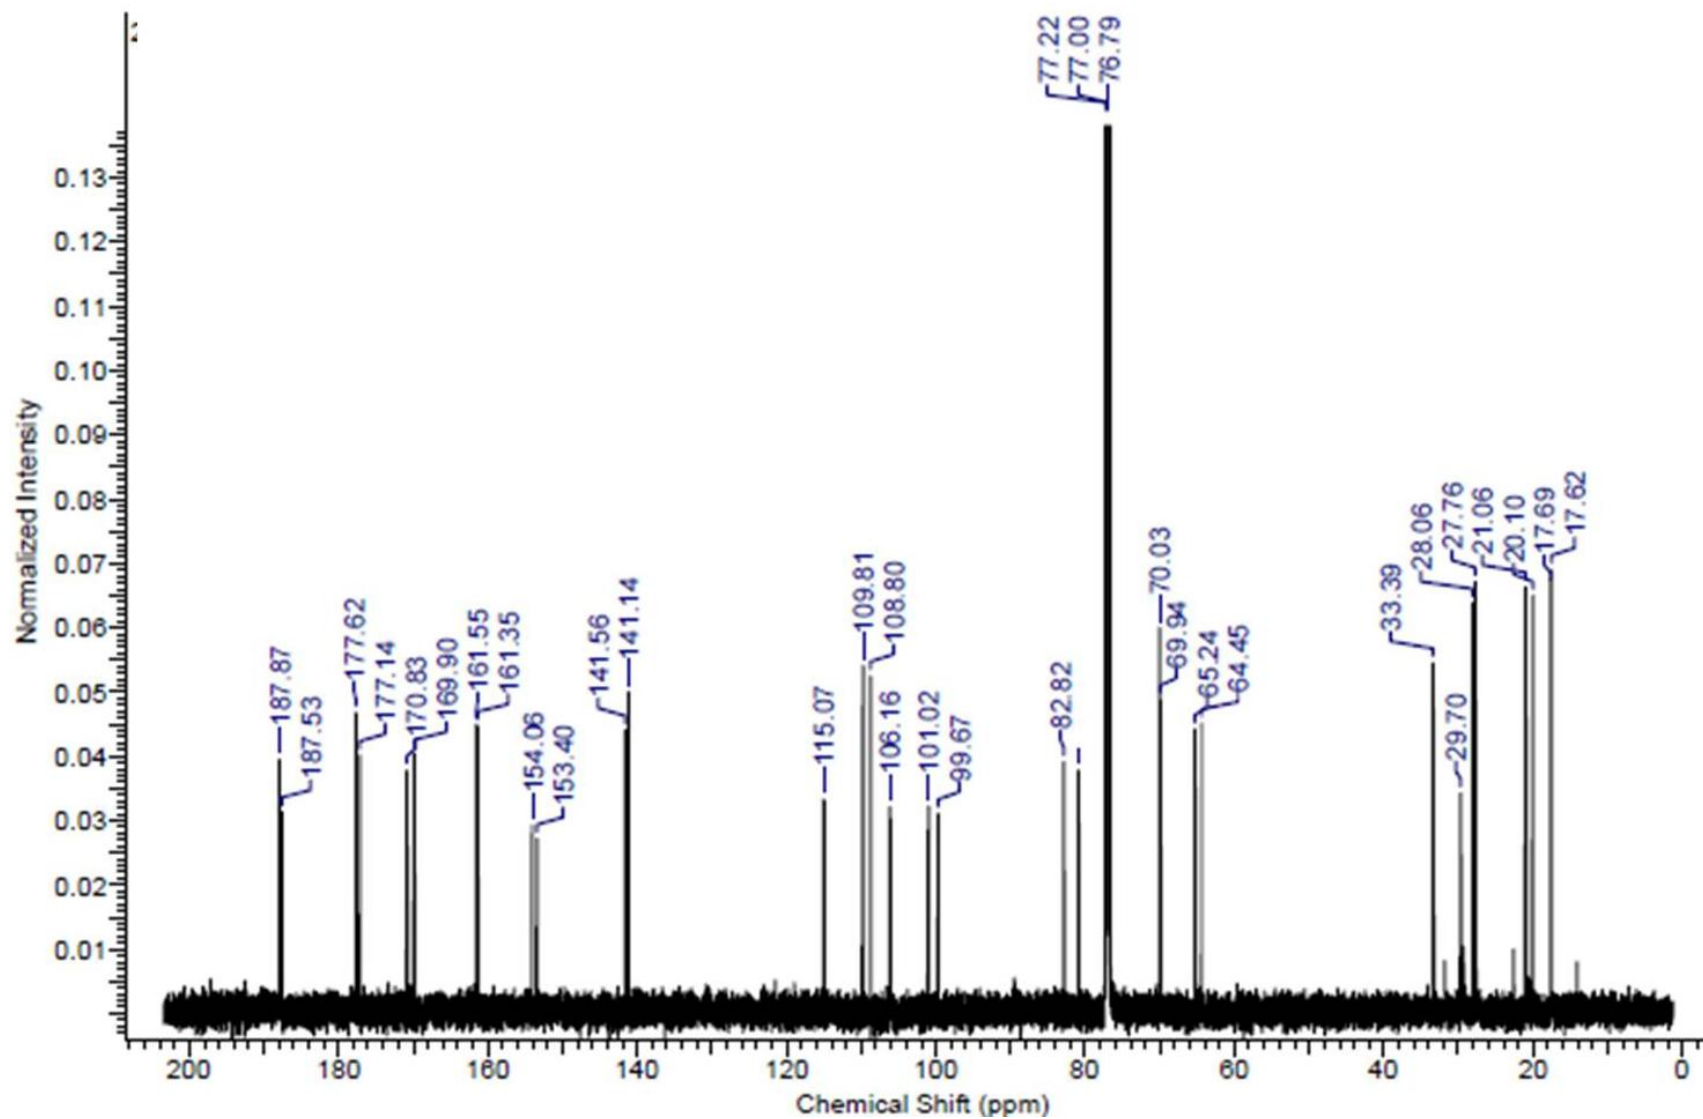

Figure S4. COSY spectrum of **14** (500 MHz, CDCl<sub>3</sub>).

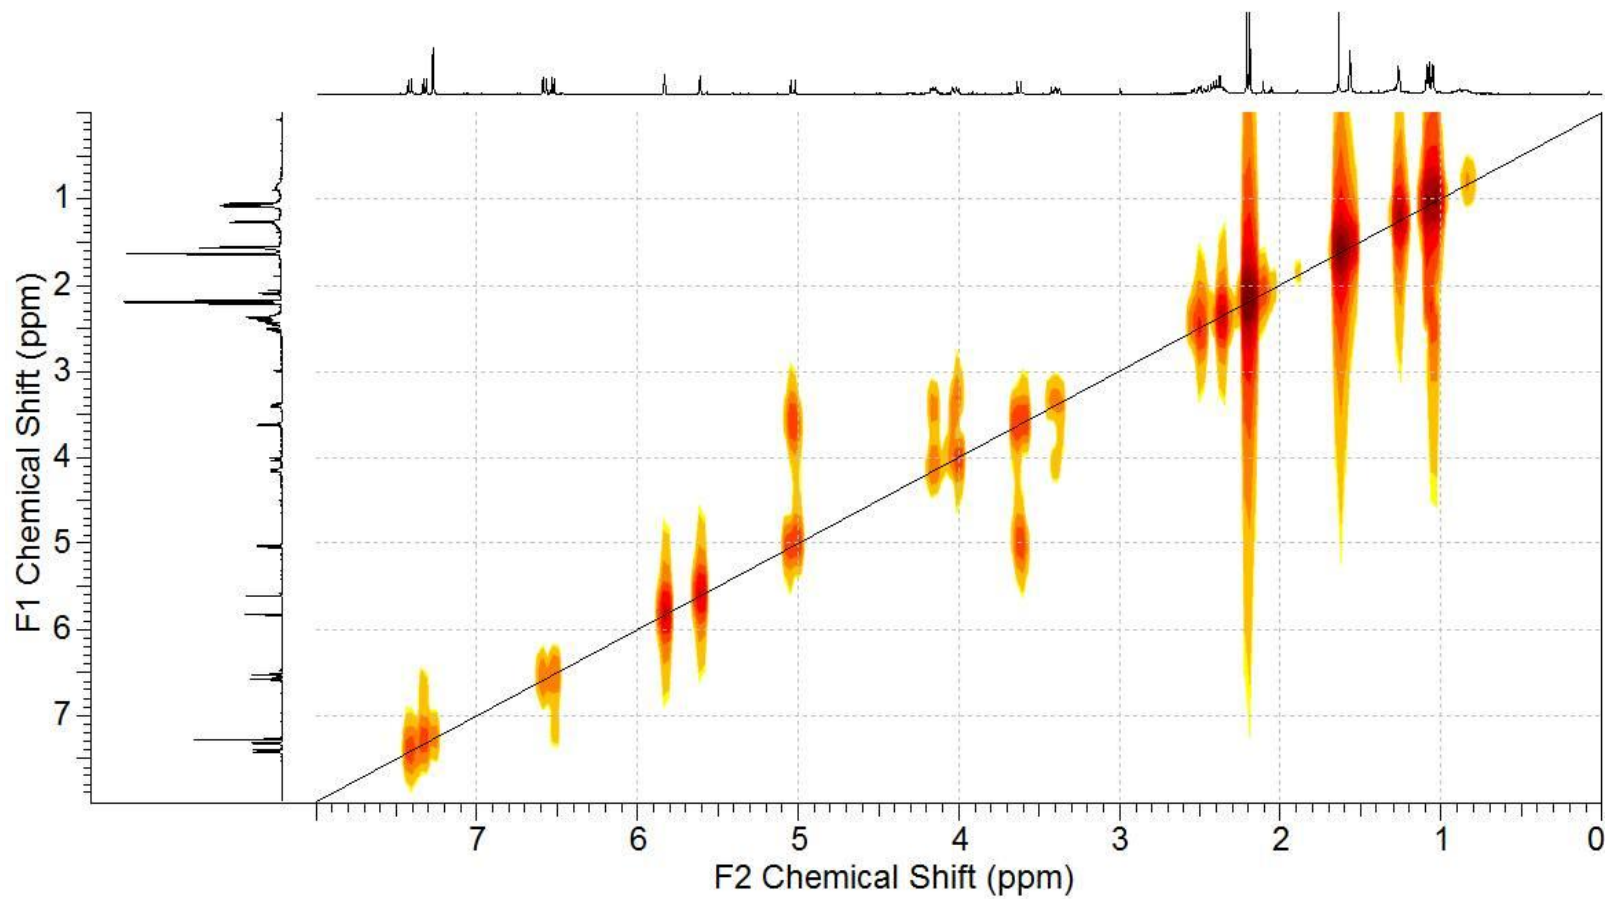

Figure S5. HSQC spectrum of **14** (500 MHz, CDCl<sub>3</sub>).

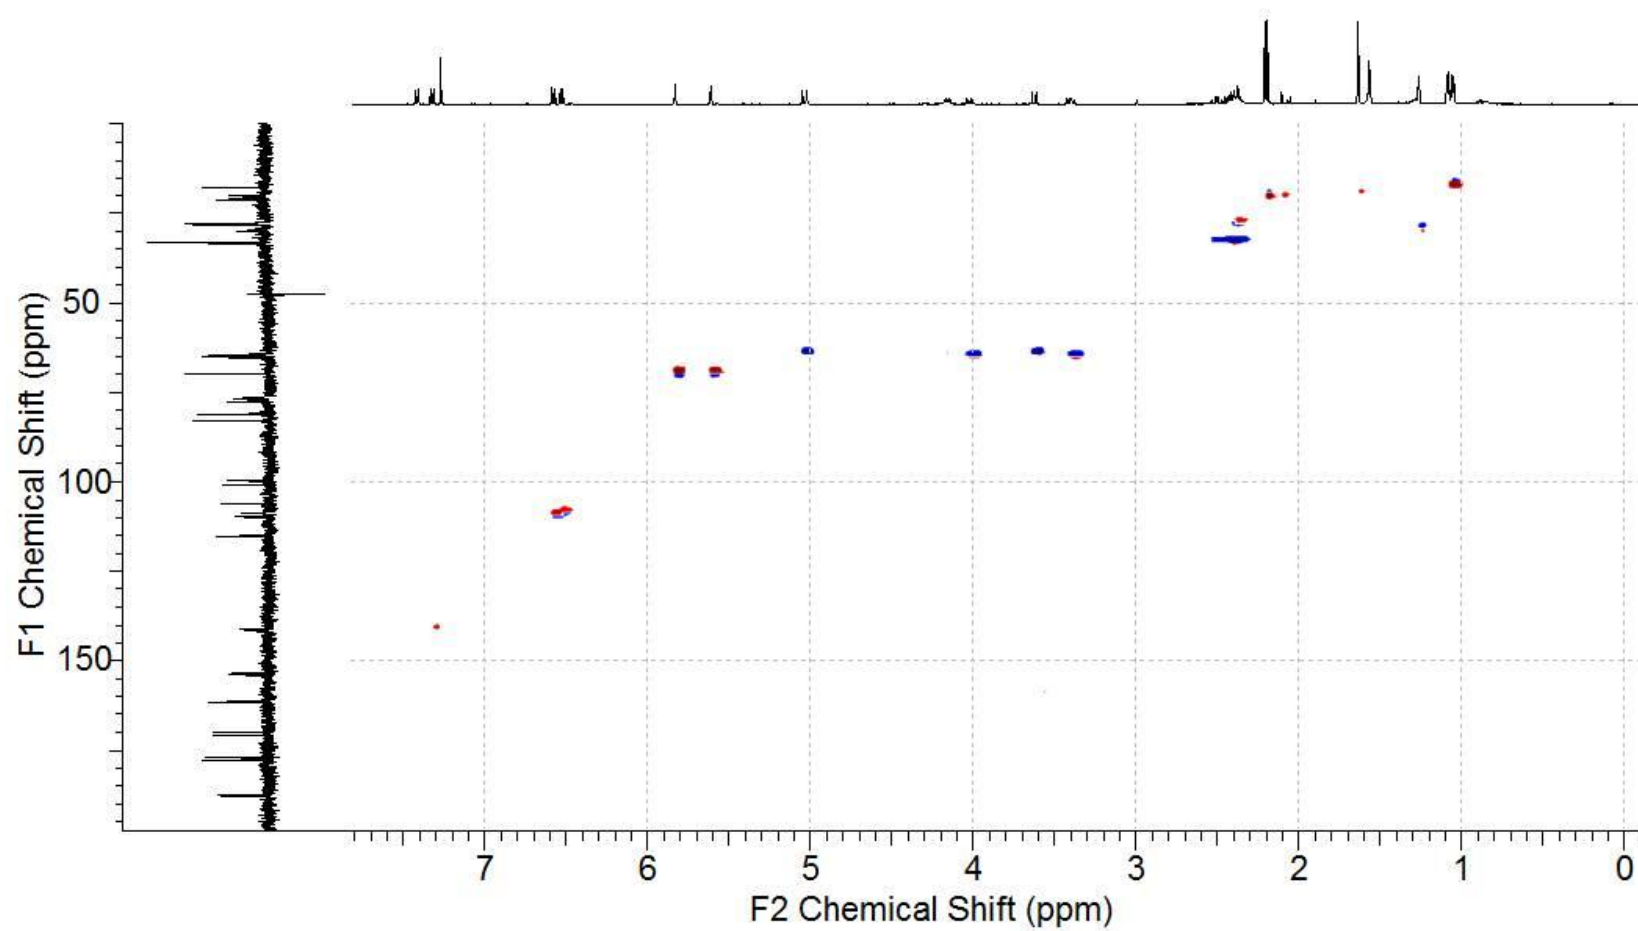

Figure S6. HMBC spectrum of **14** (500 MHz, CDCl<sub>3</sub>).

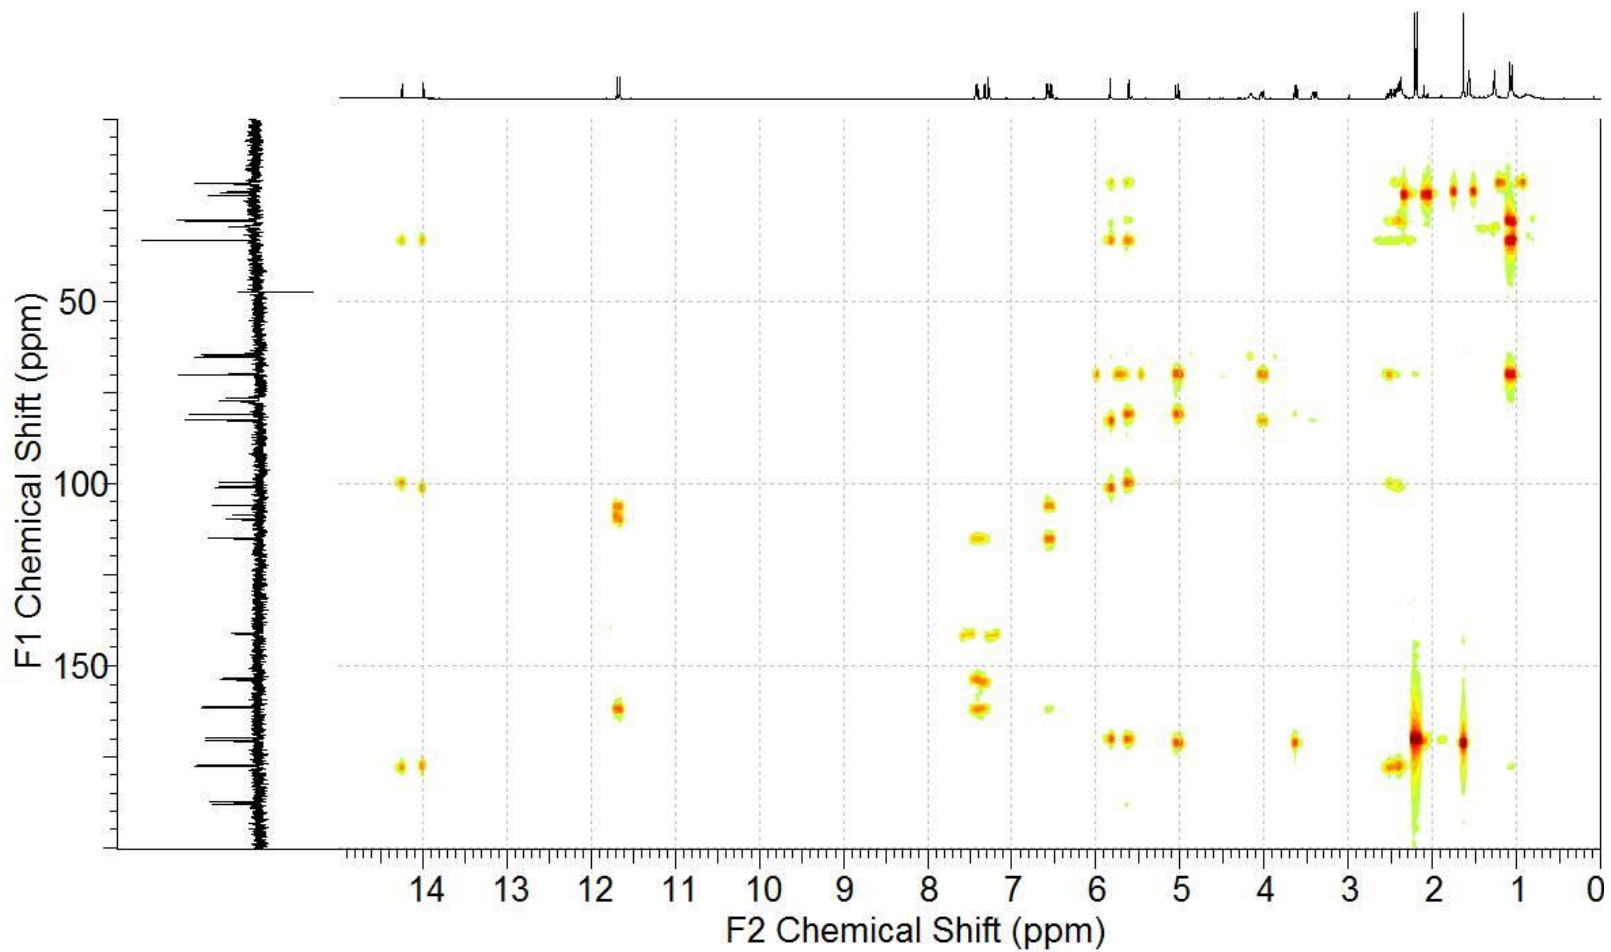

Figure S7. ROESY spectrum of **14** (500 MHz, CDCl<sub>3</sub>).

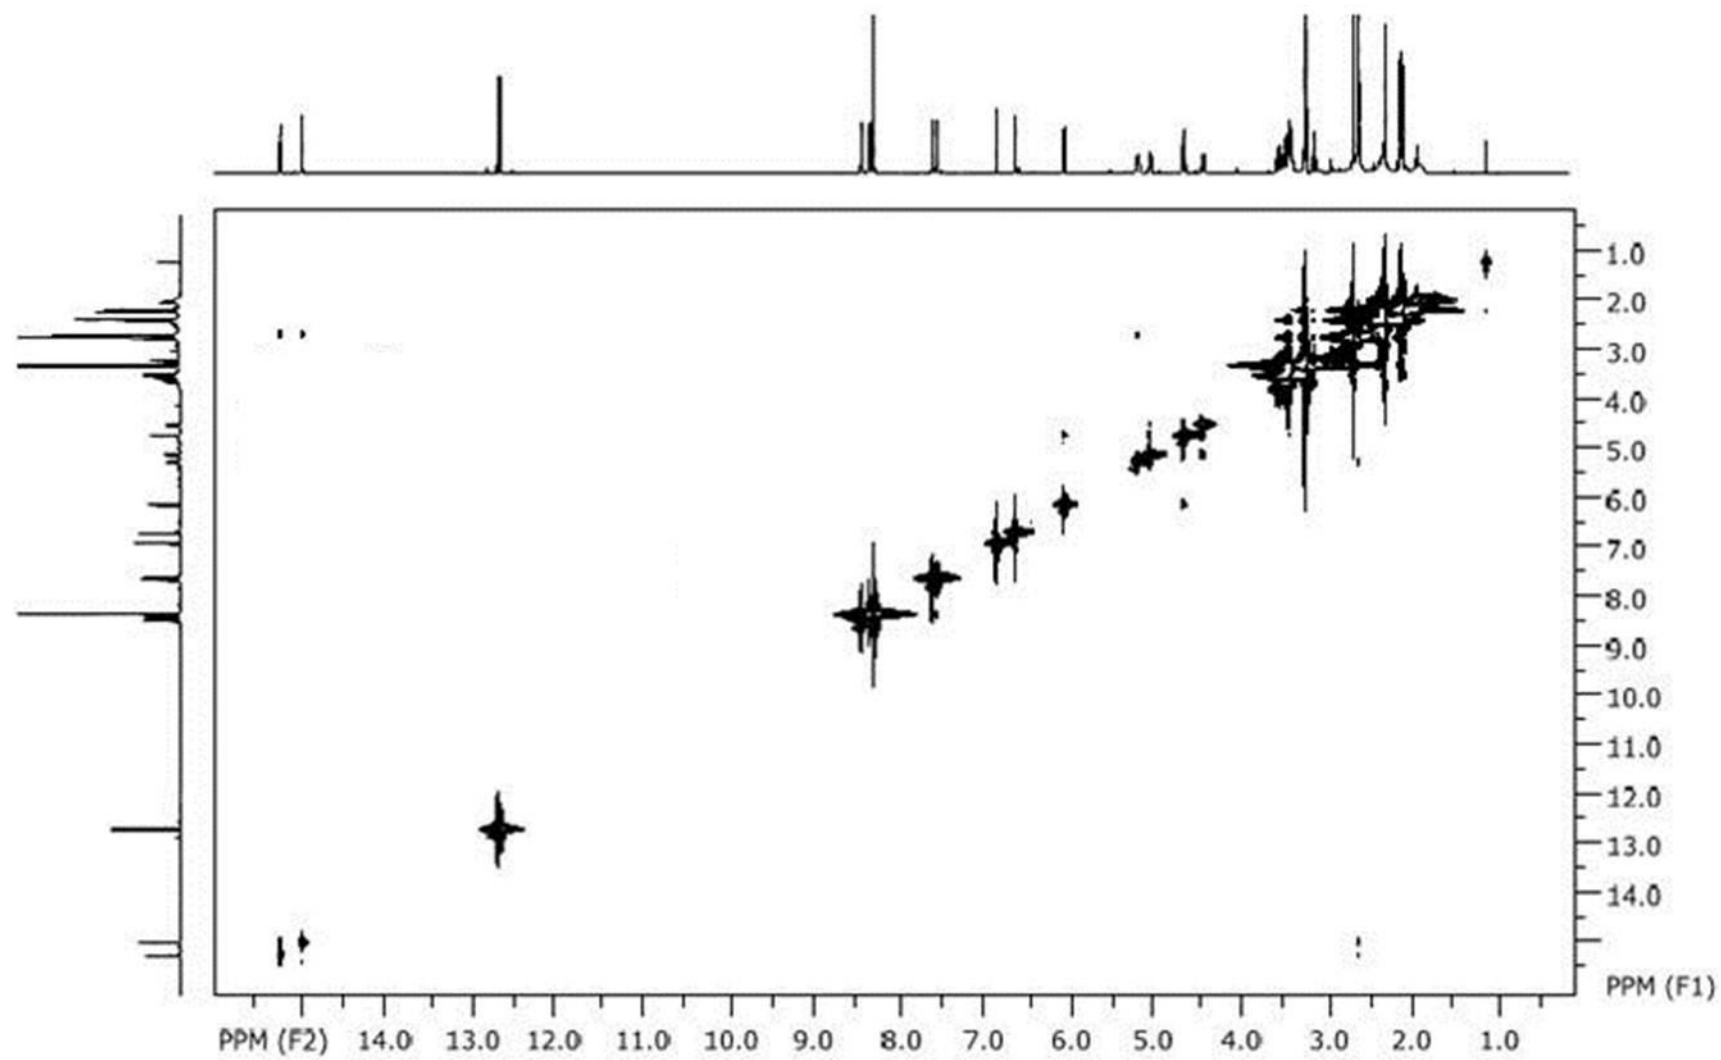



**Figure S8.** Isolation scheme for **15** and **16**. Red highlights indicate antimalarial activity.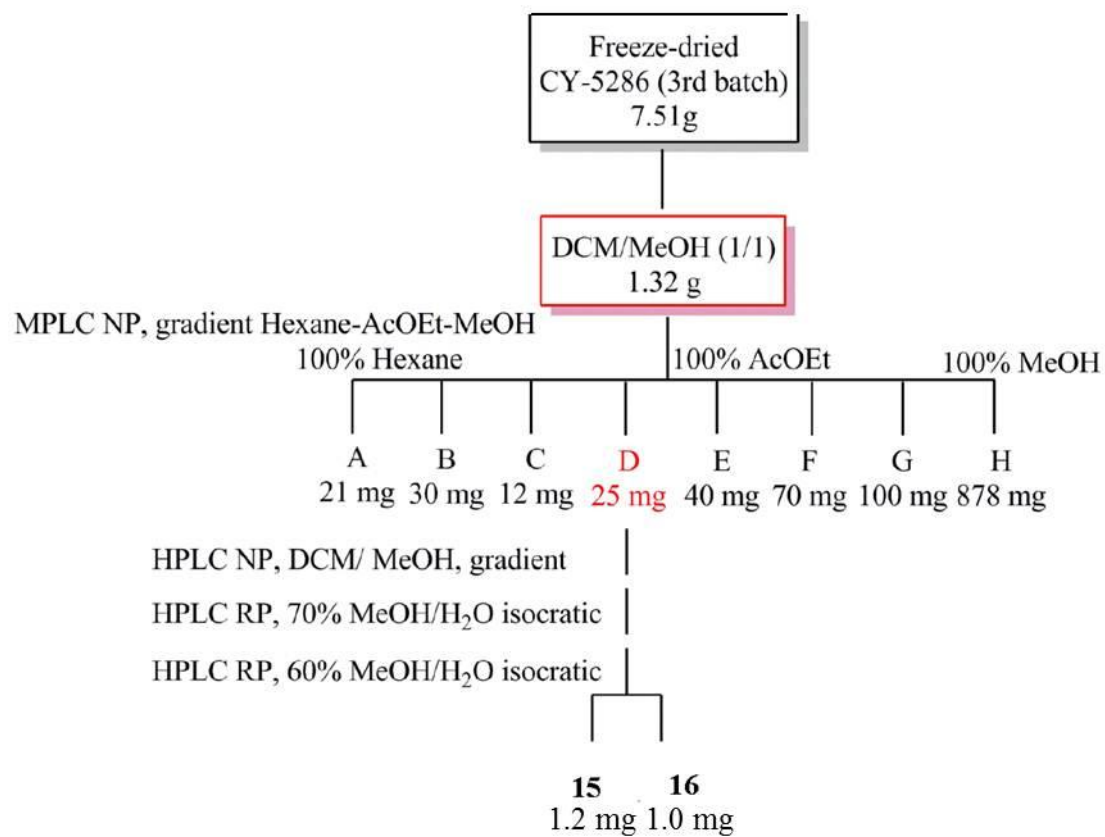

**Figure S9.**  $^1\text{H}$  NMR spectrum of **15** (500 MHz,  $\text{CDCl}_3$ ).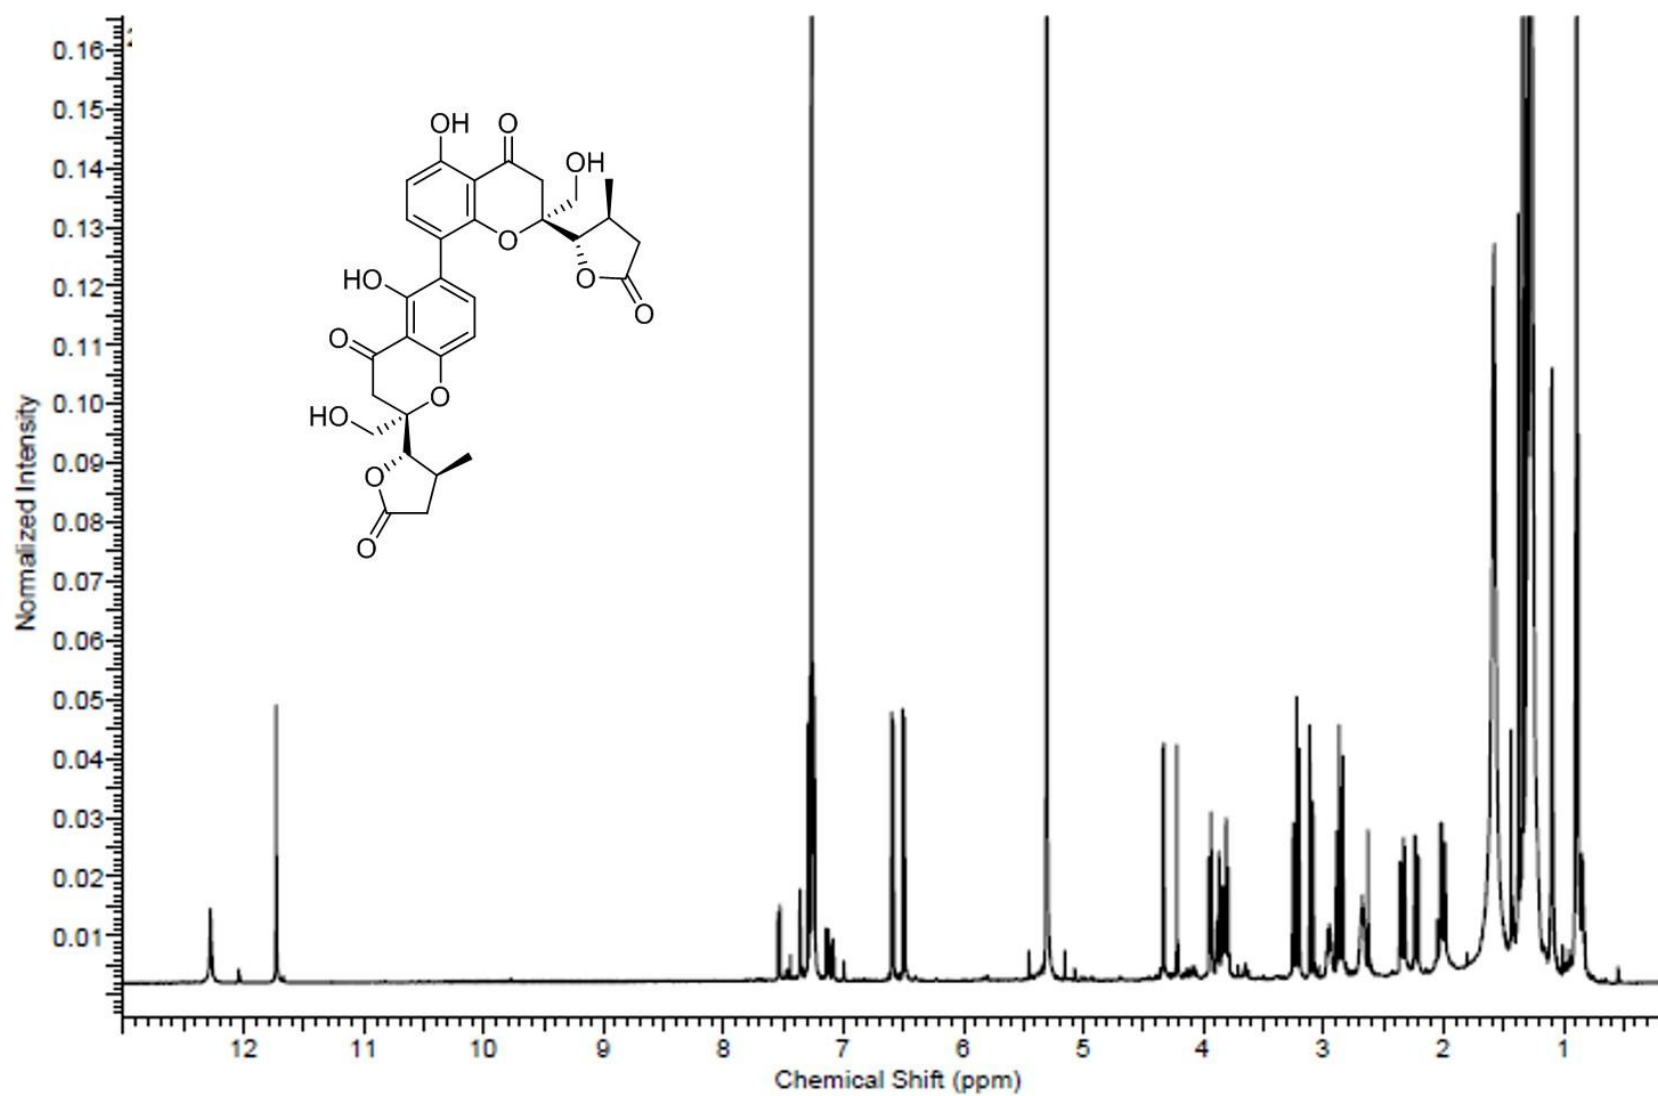

**Figure S10.**  $^{13}\text{C}$  NMR spectrum of **15** (125 MHz,  $\text{CDCl}_3$ ).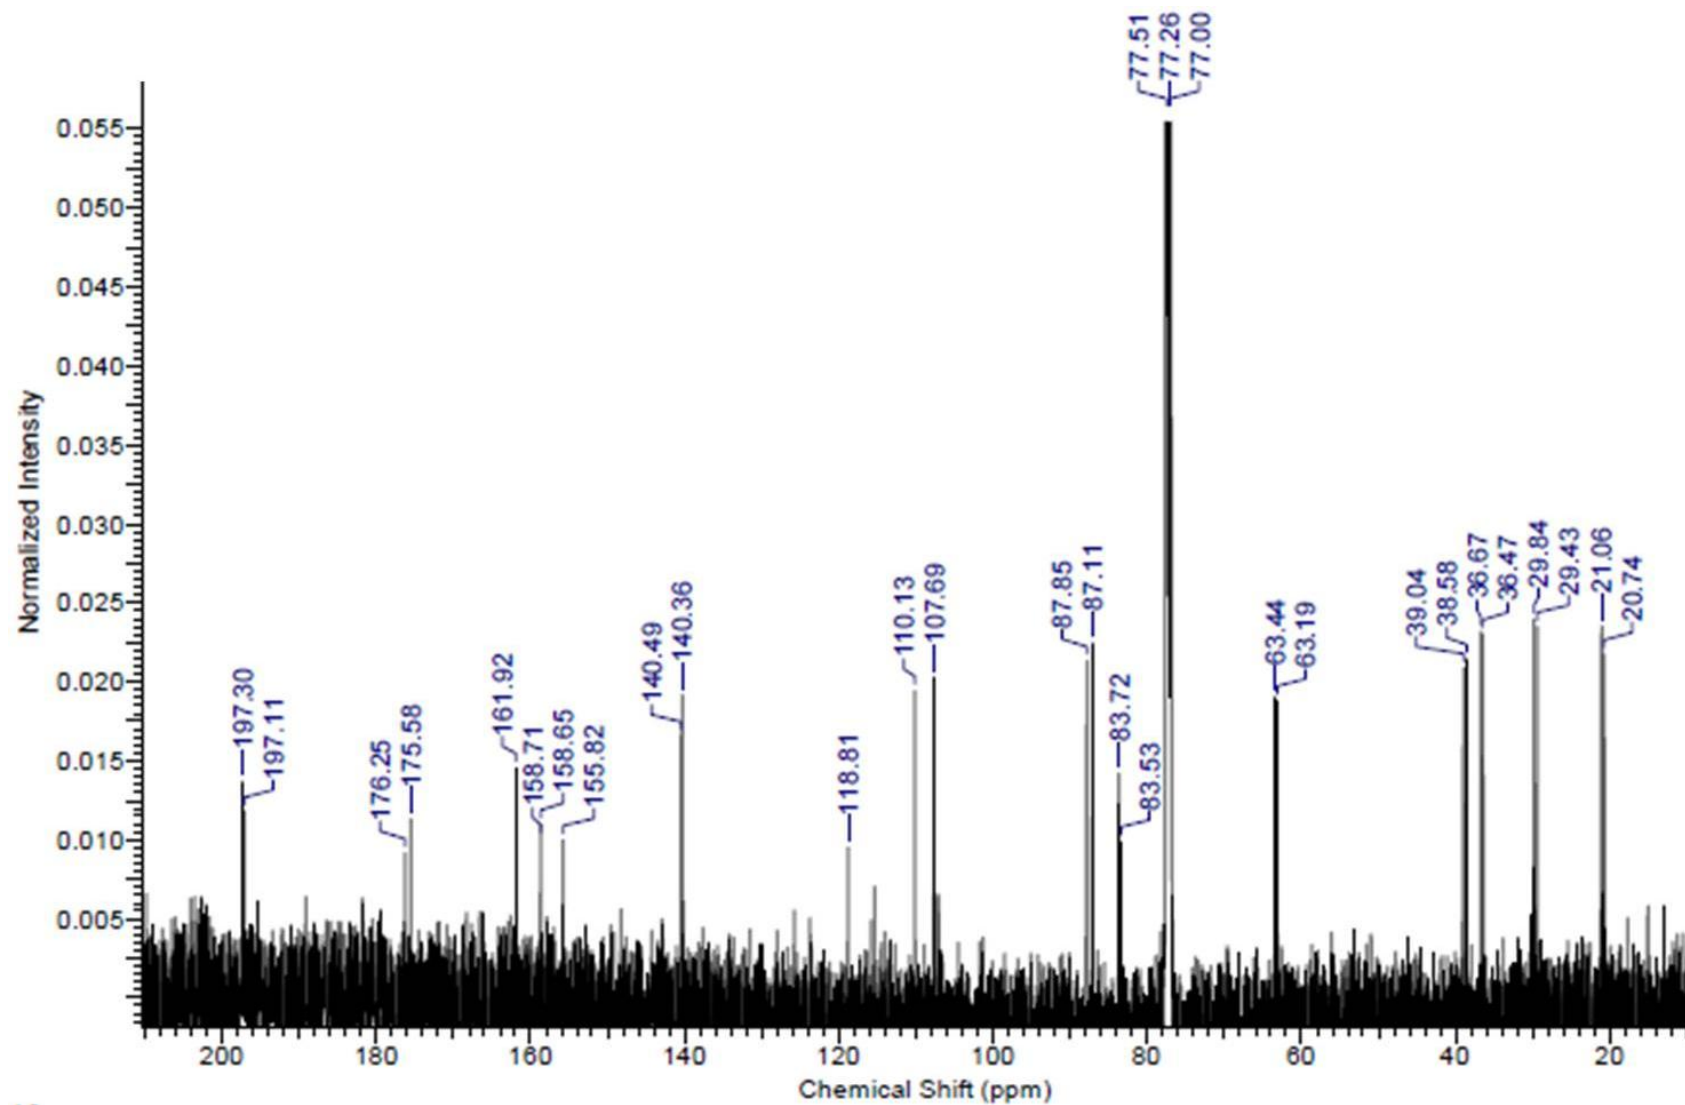

Figure S11. COSY spectrum of **15** (500 MHz, CDCl<sub>3</sub>).

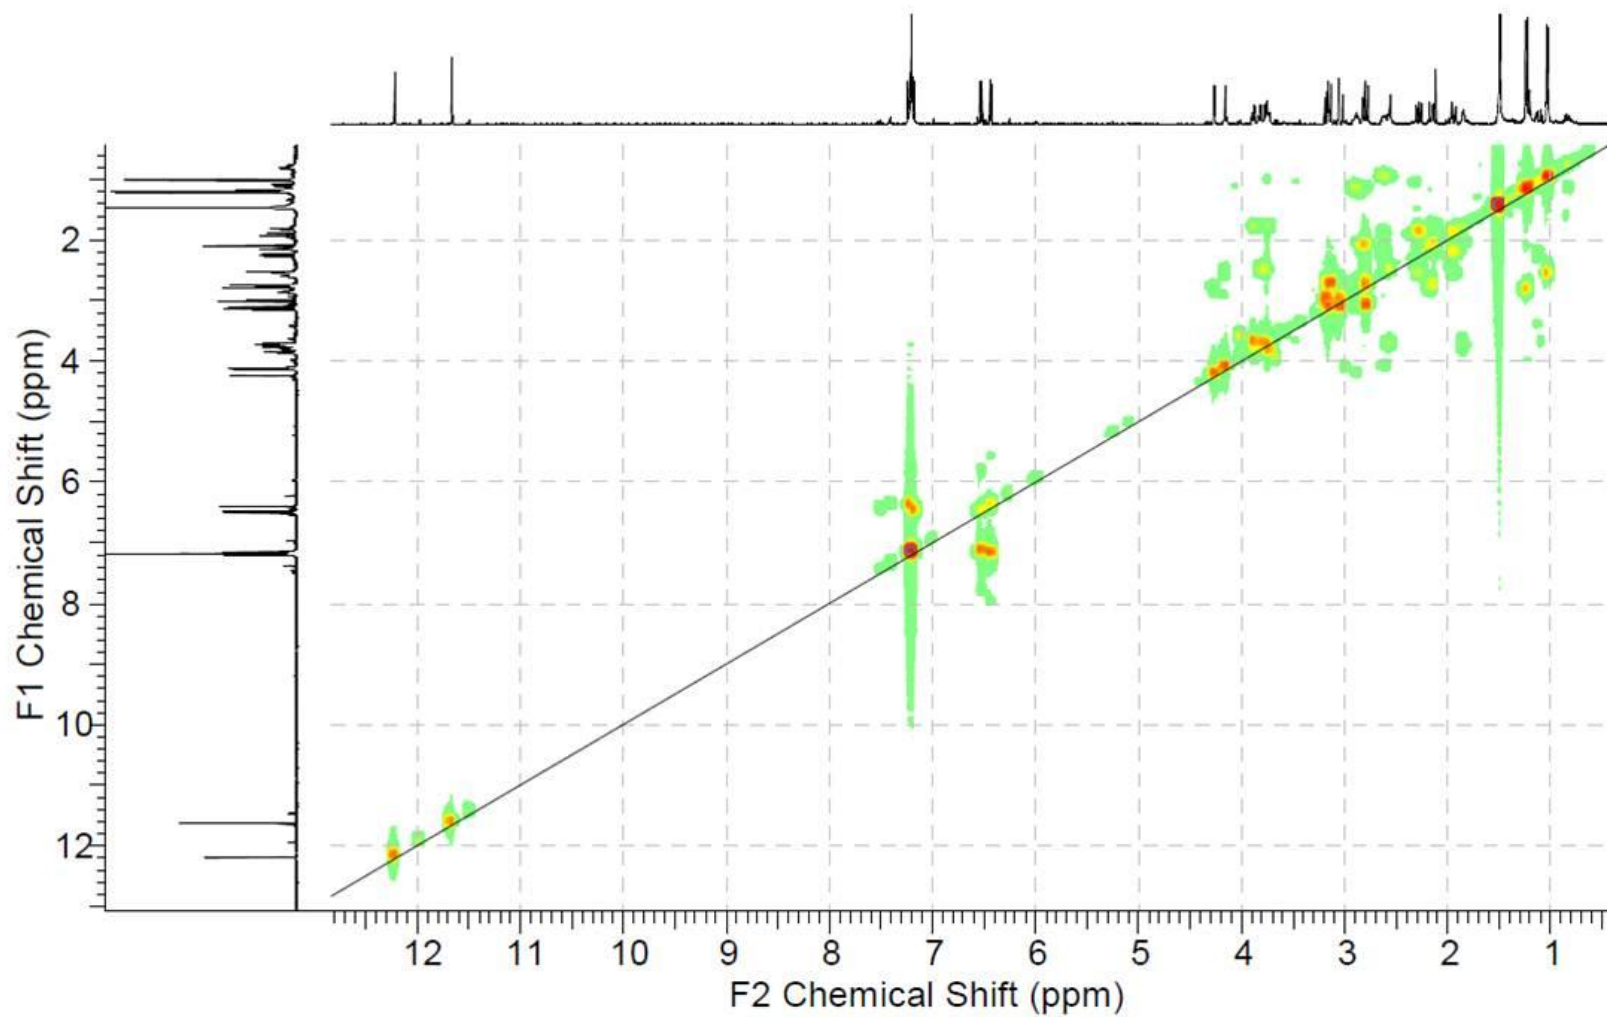

Figure S12. HSQC spectrum of **15** (500 MHz, CDCl<sub>3</sub>).

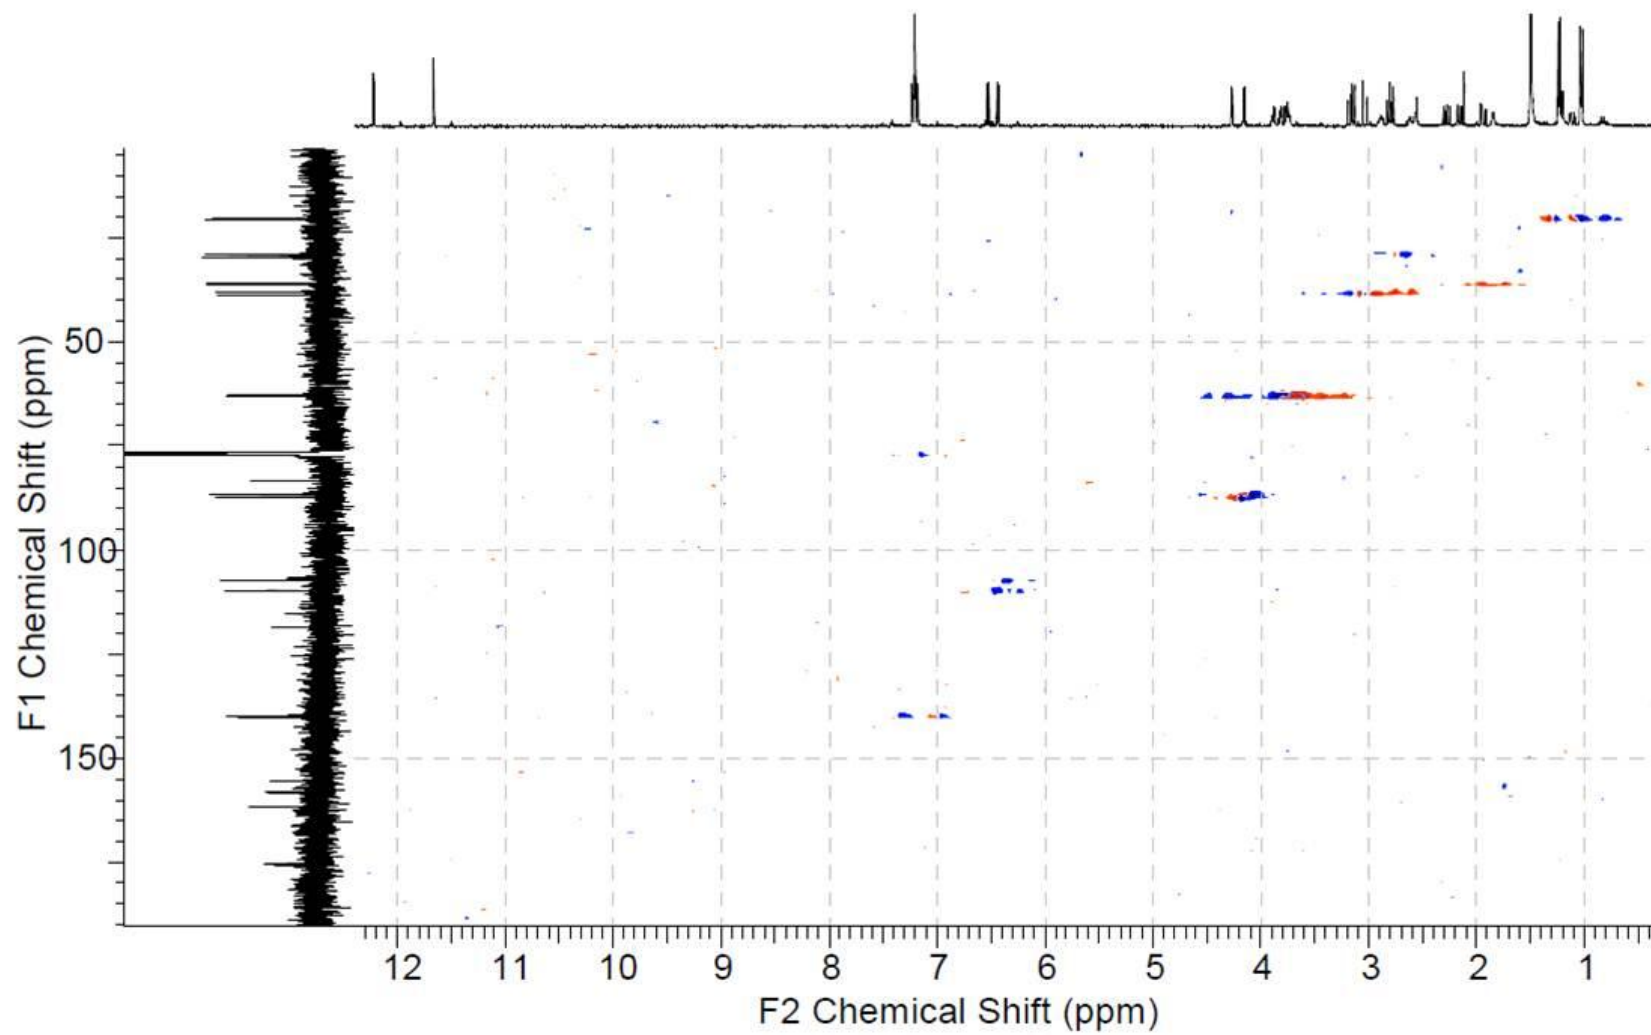

Figure S13. HMBC spectrum of **15** (500 MHz, CDCl<sub>3</sub>).

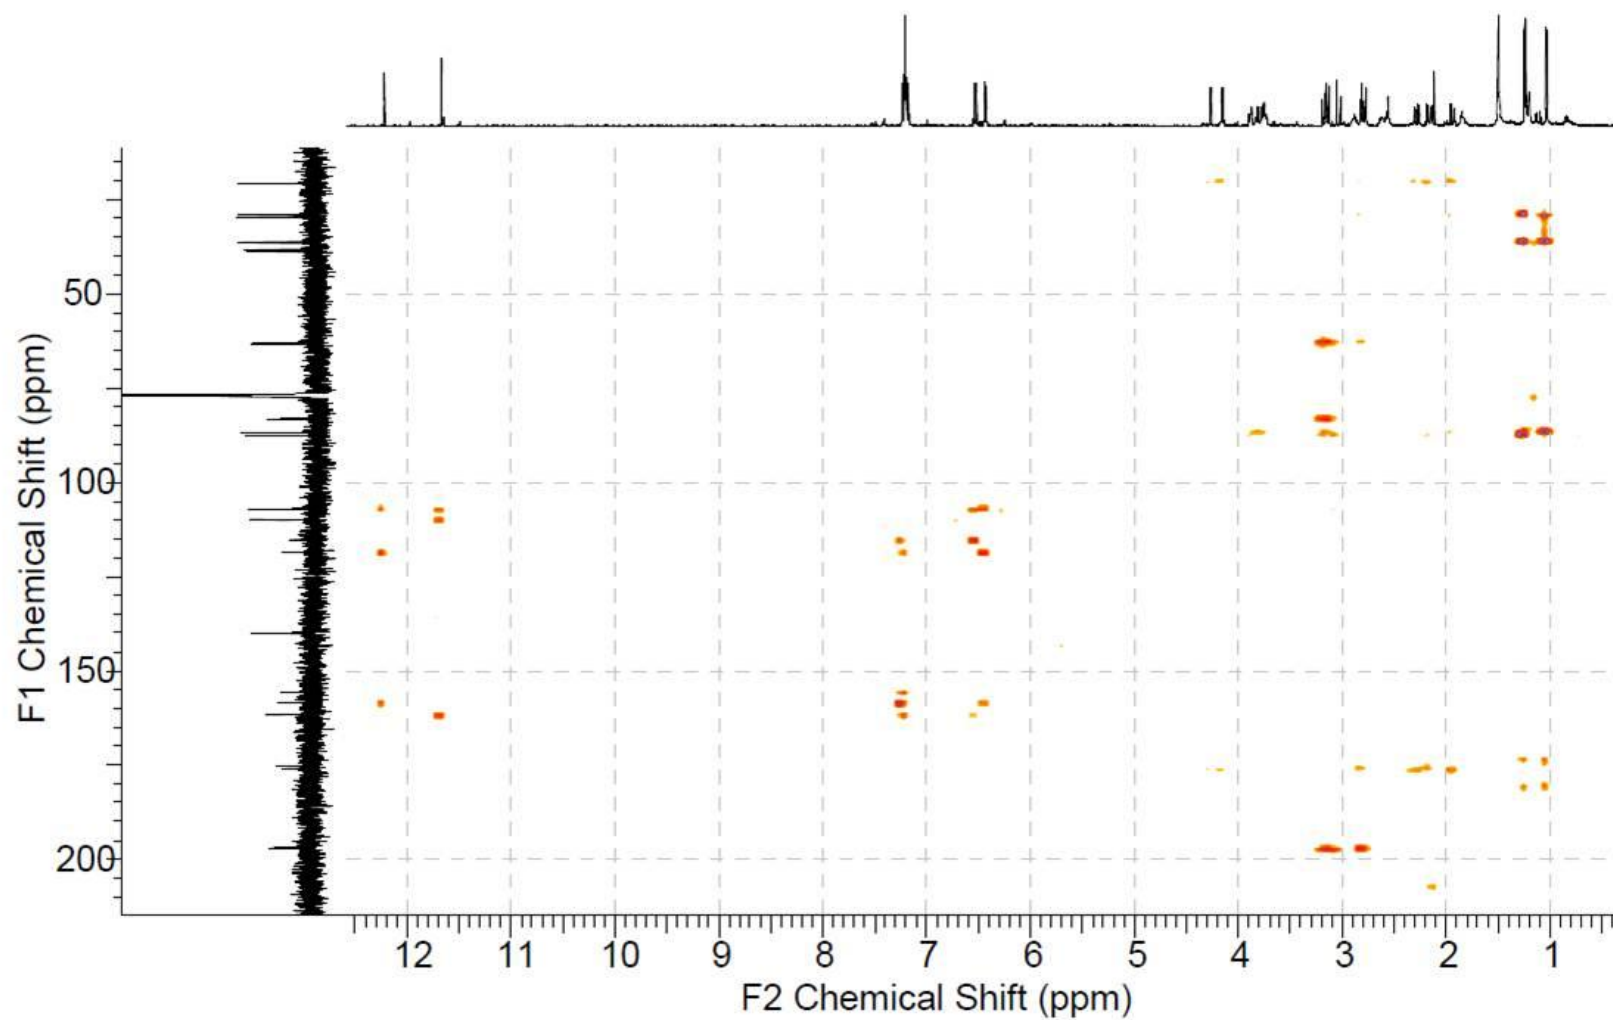

**Figure S14.** Expansion of ROESY spectrum of **15**, 0–5 ppm (600 MHz, CDCl<sub>3</sub>).

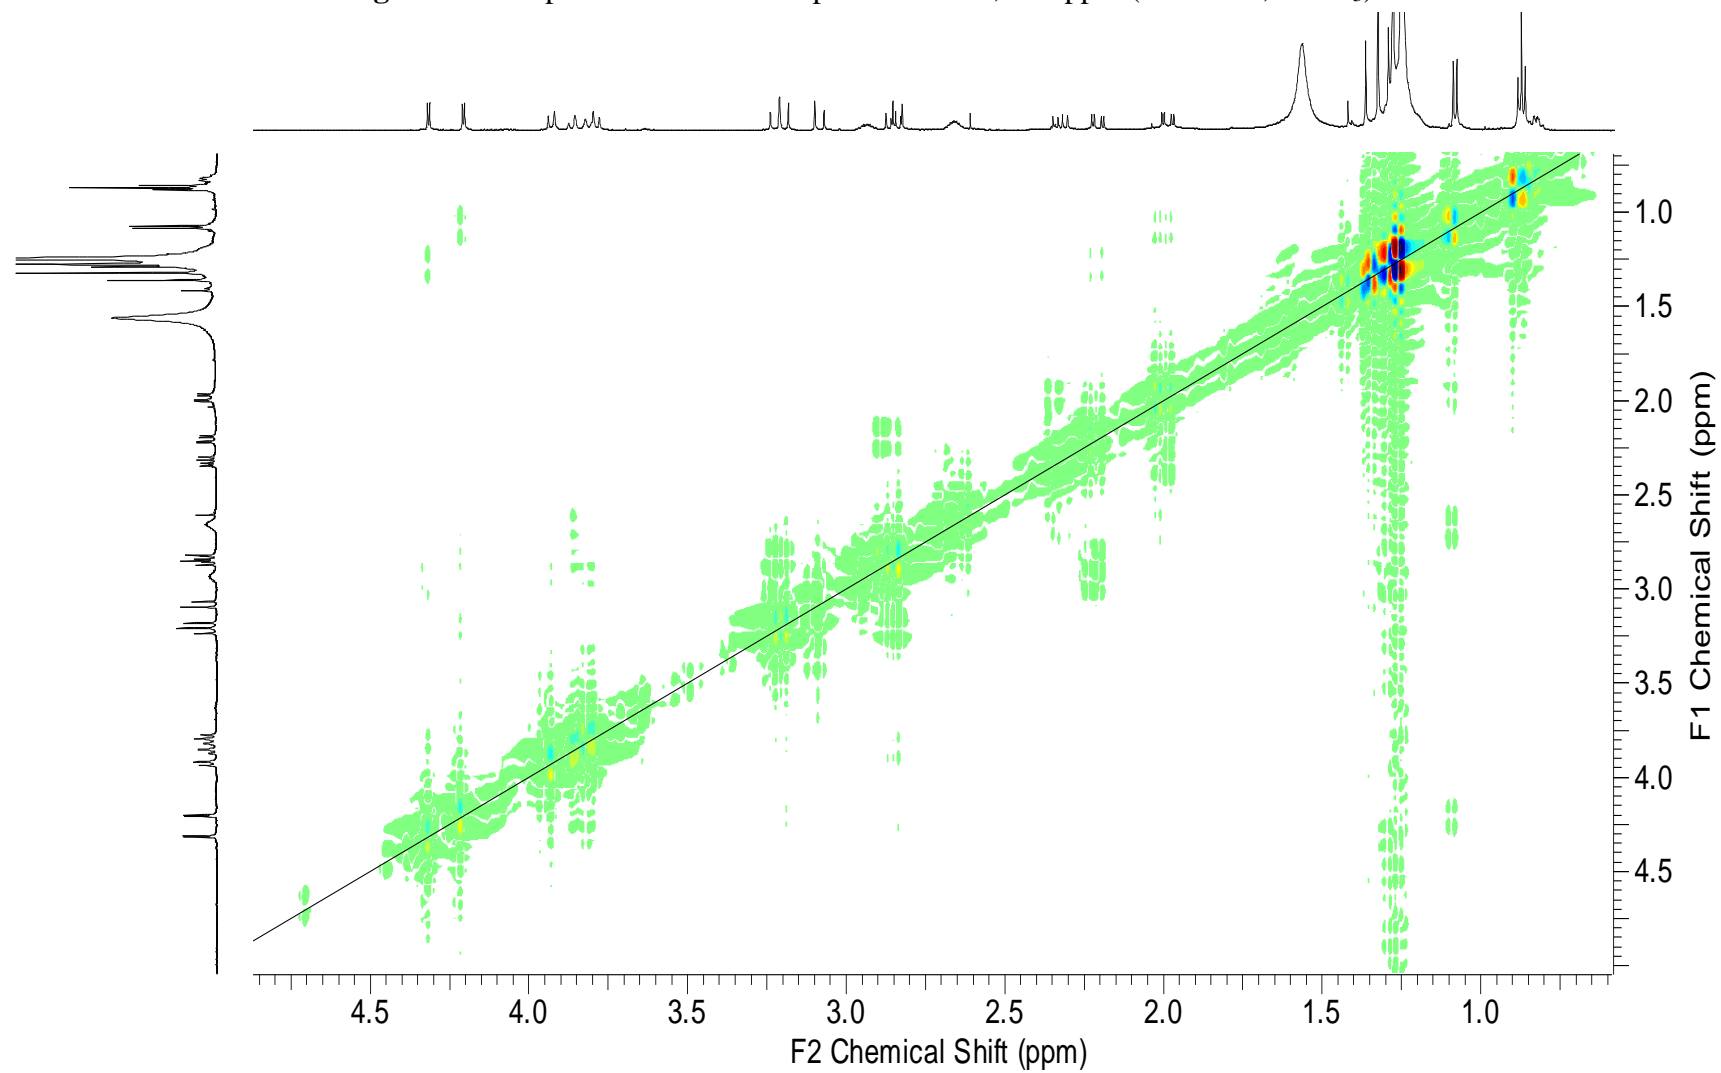

**Figure S15.**  $^1\text{H}$  NMR spectrum of **16** (500 MHz,  $\text{CDCl}_3$ ).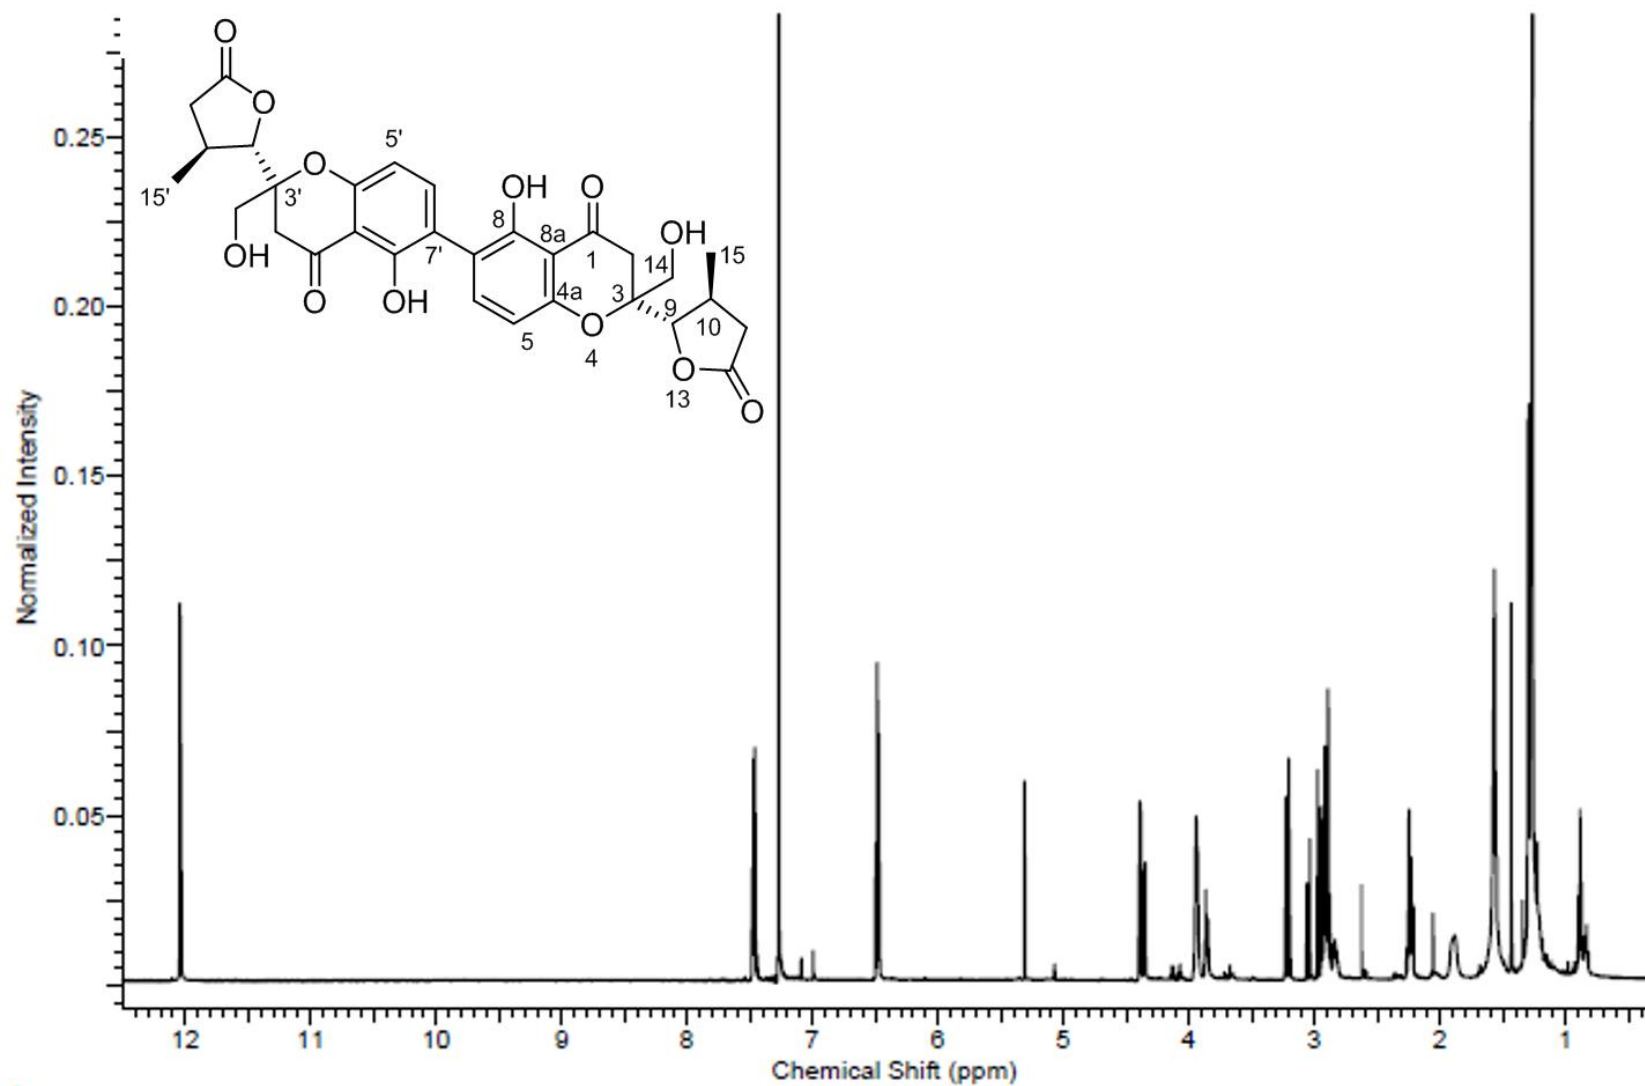



**Figure S16.**  $^{13}\text{C}$  NMR spectrum of **16** (125 MHz,  $\text{CDCl}_3$ ).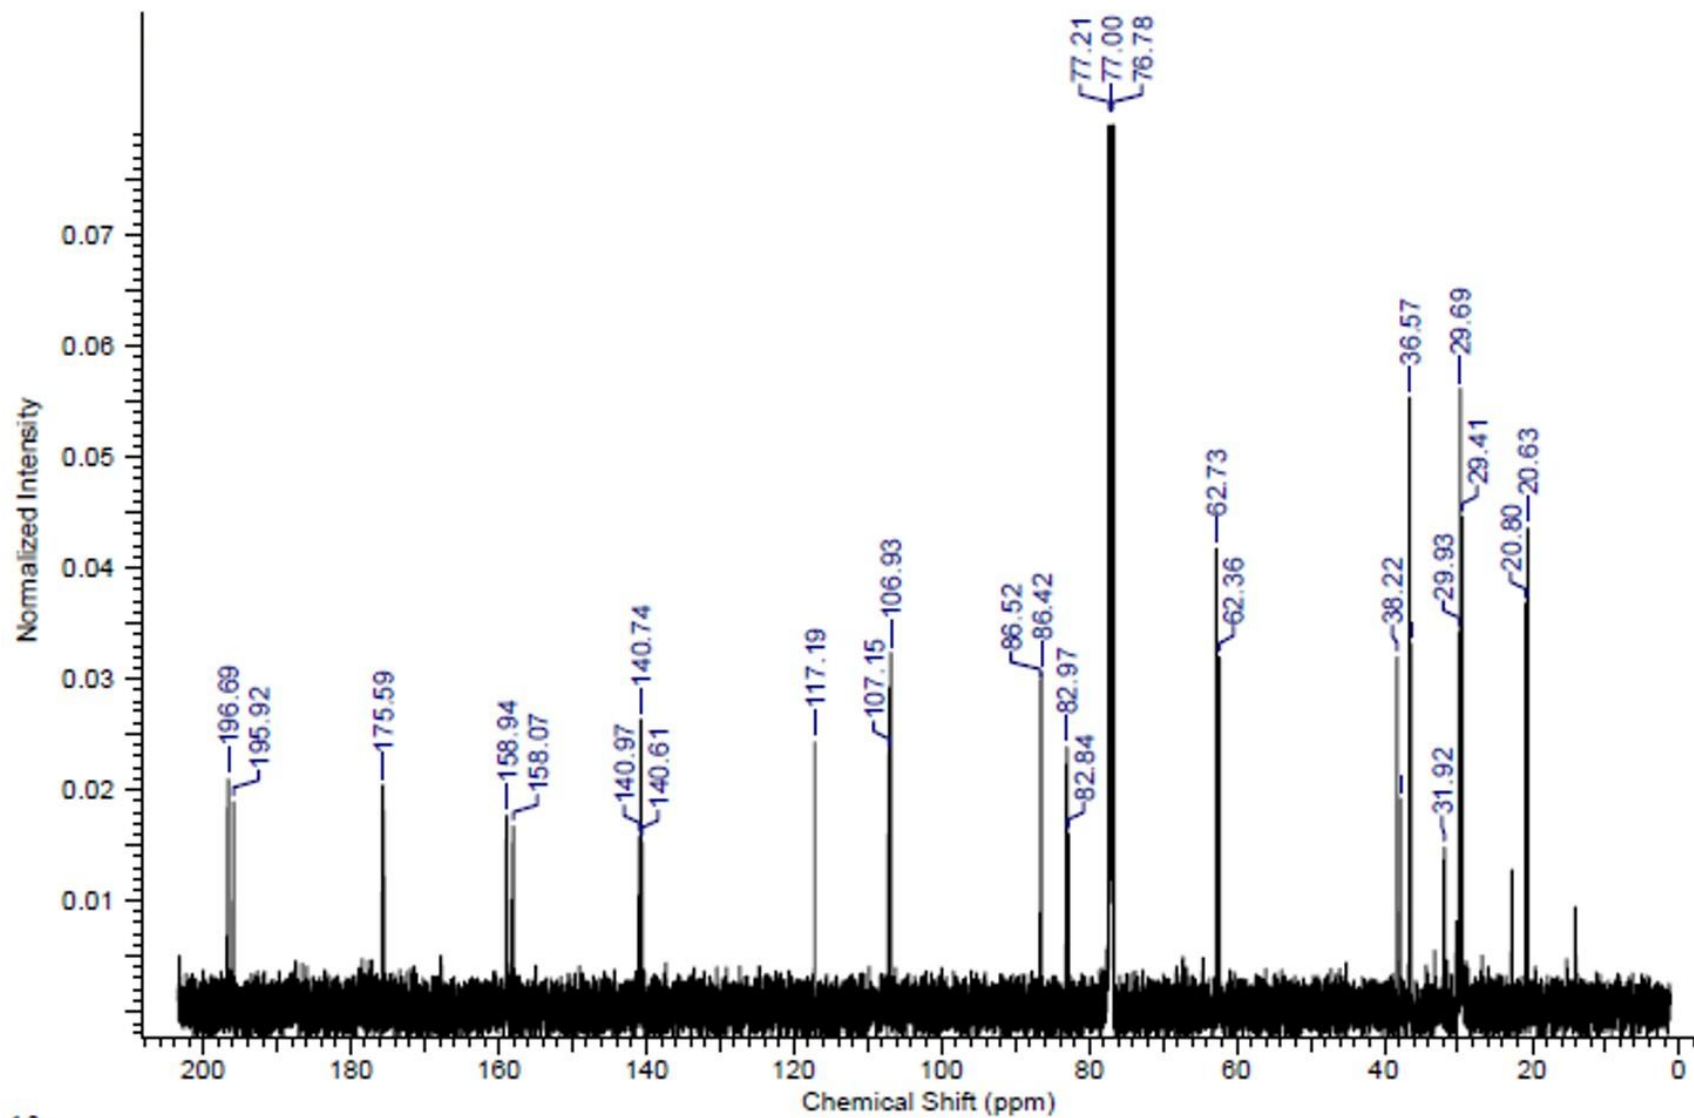

Figure S17. COSY spectrum of **16** (500 MHz,  $\text{CDCl}_3$ ).

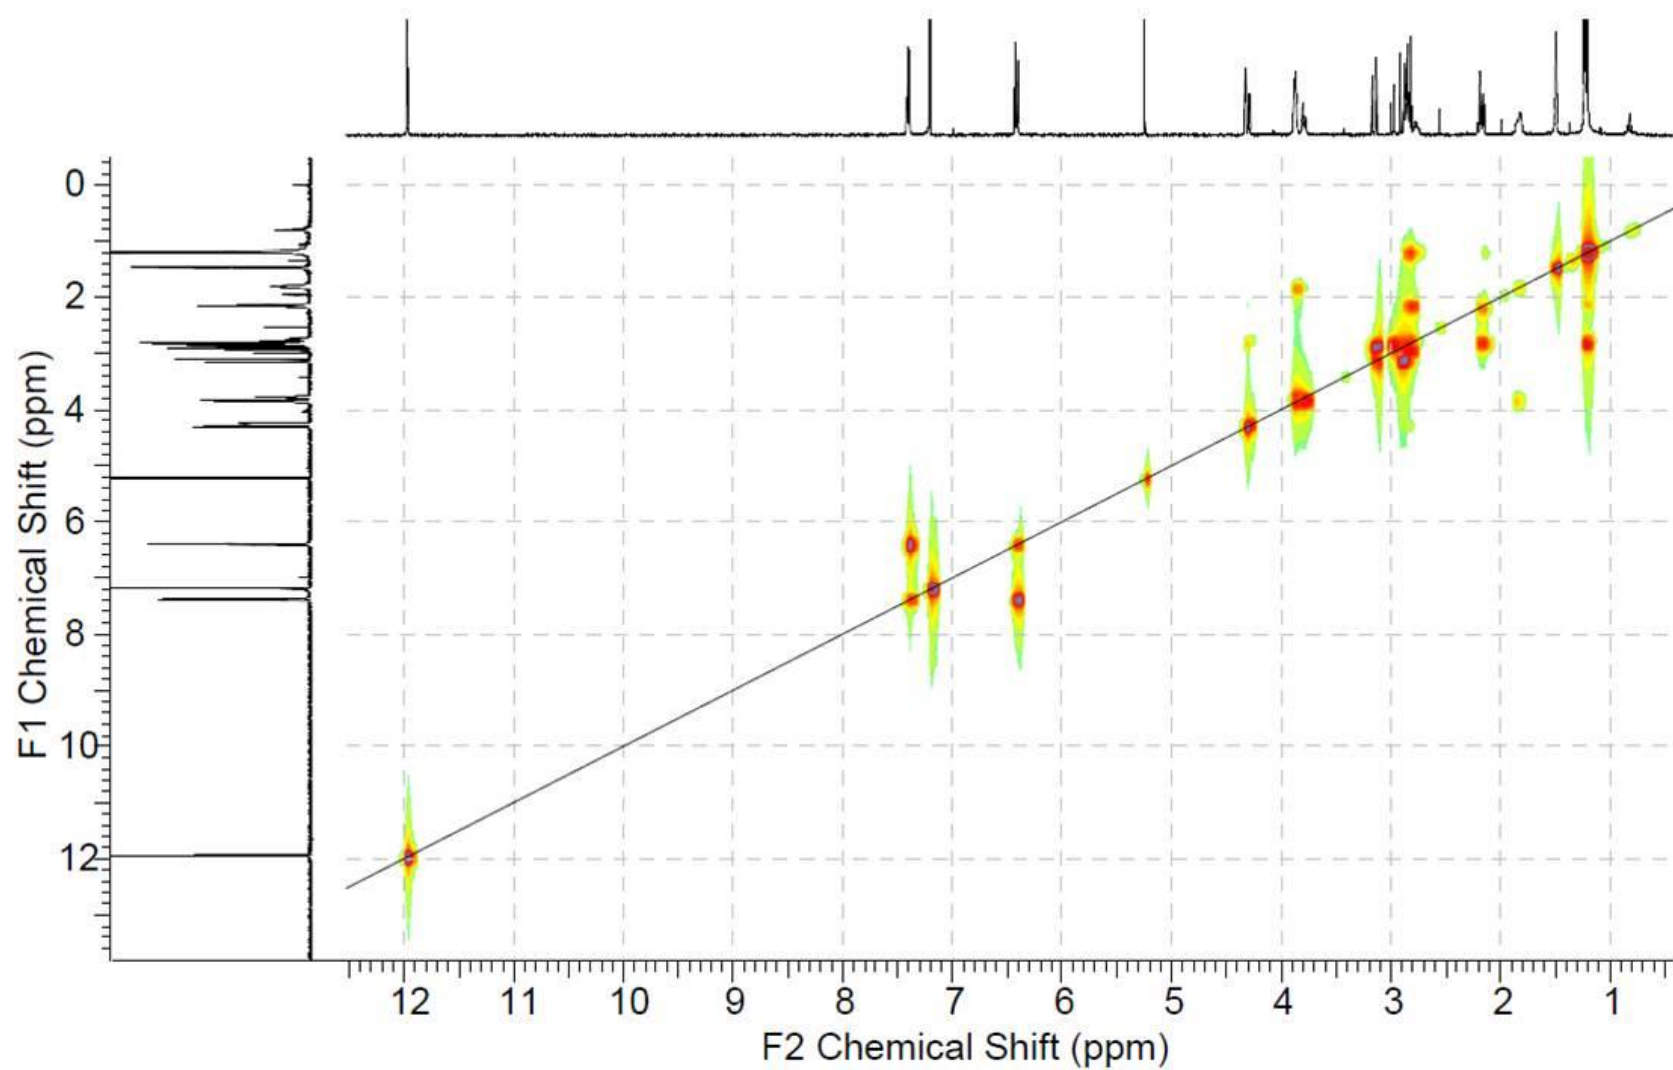

Figure S18. HSQC spectrum of **16** (500 MHz,  $\text{CDCl}_3$ ).

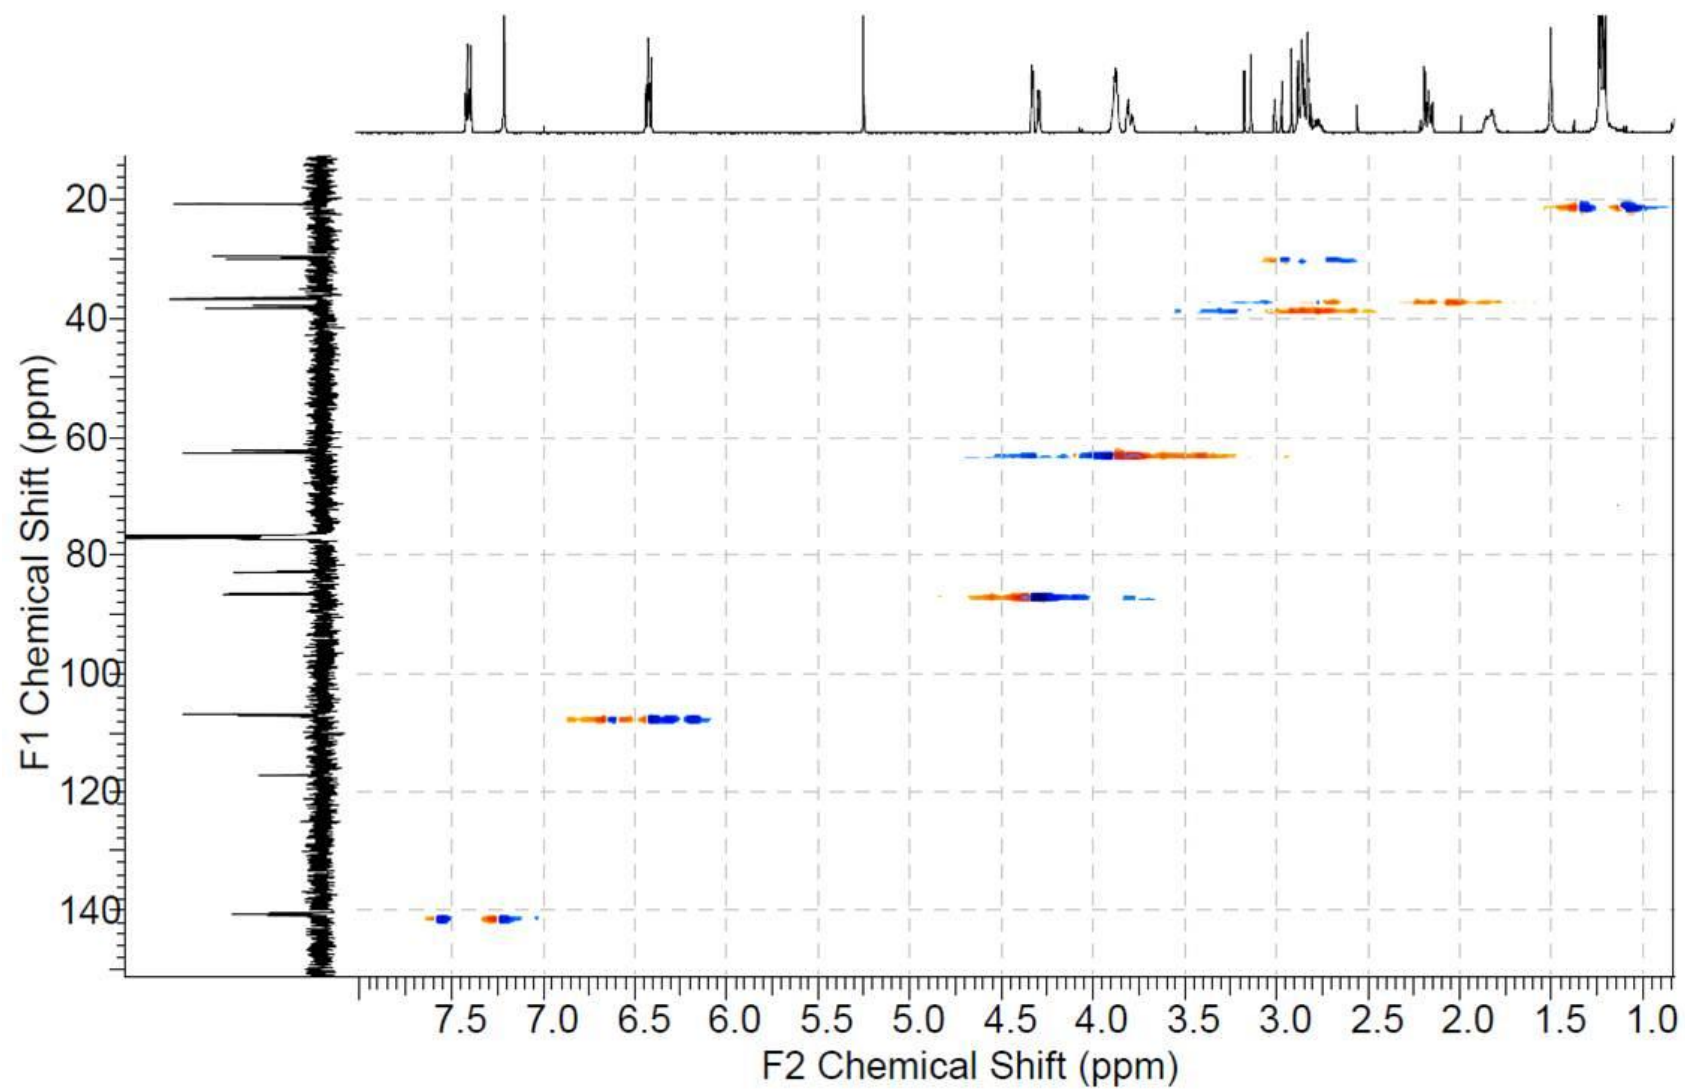

**Figure S19.** HMBC spectrum of **16** (500 MHz, CDCl<sub>3</sub>).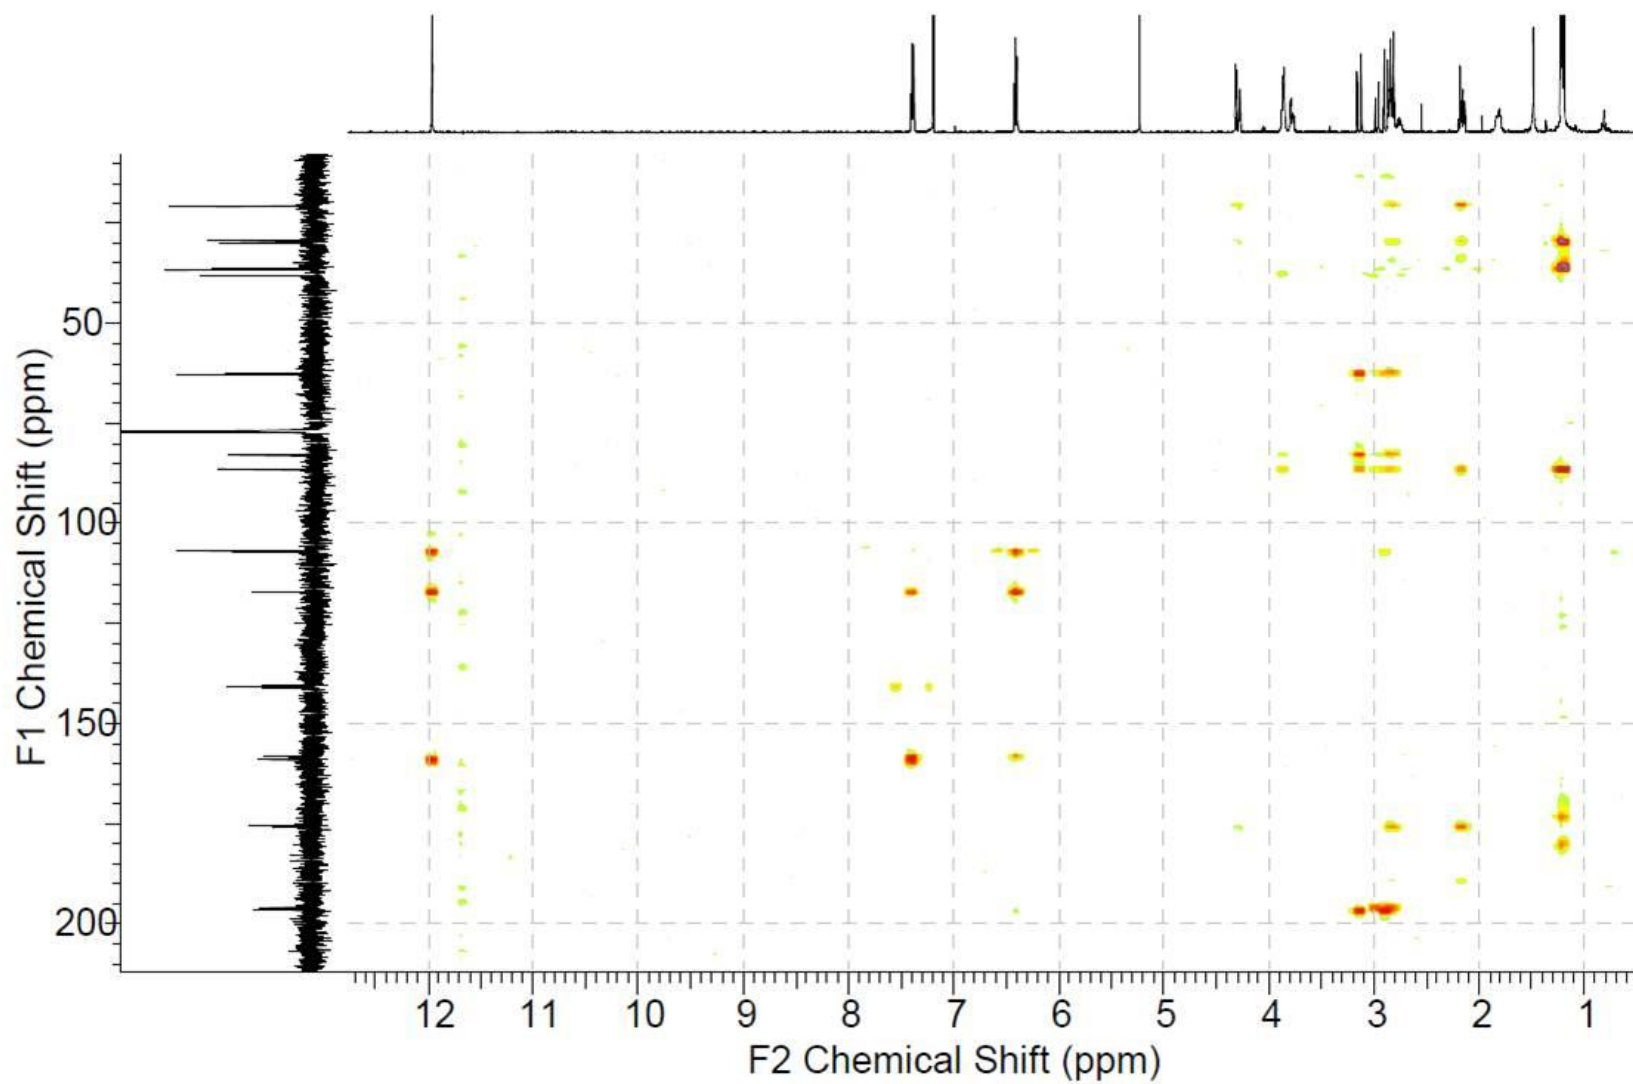

**Figure S20.** Expansion of ROESY spectrum of **16**, 1.0–5.0 ppm (600 MHz, CDCl<sub>3</sub>).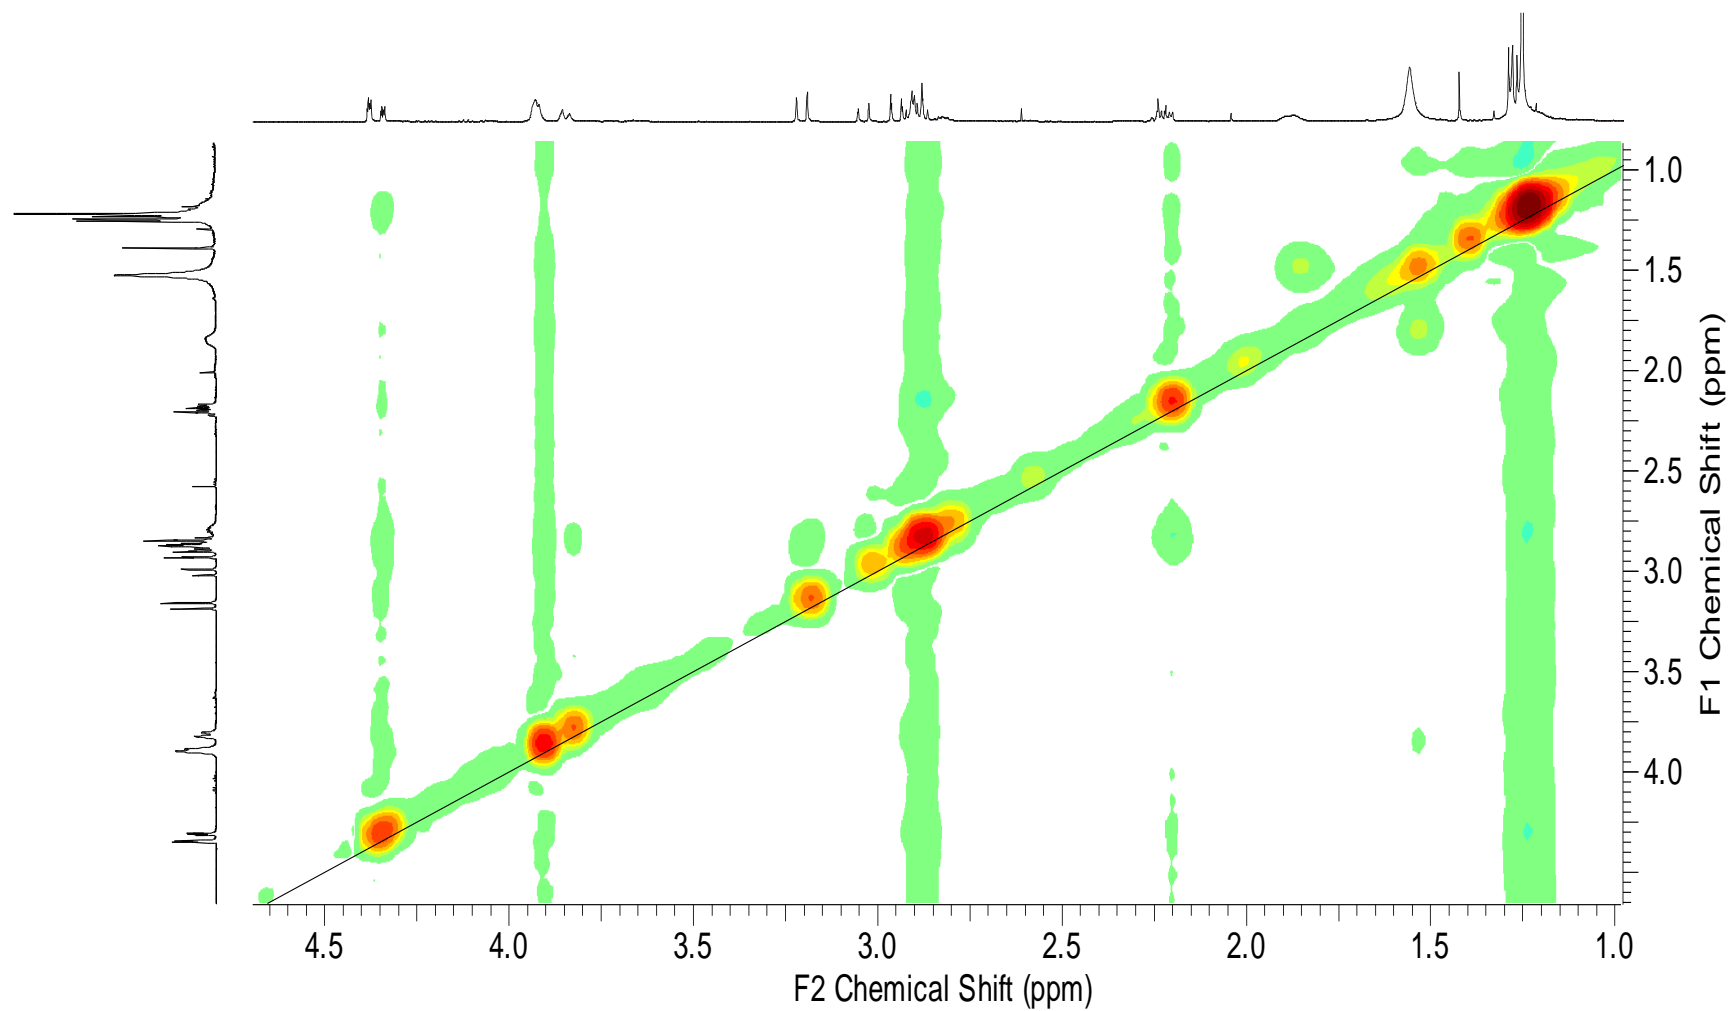

**Figure S21.** Isolation scheme for lipid **18**. Red highlights indicate antimalarial activity.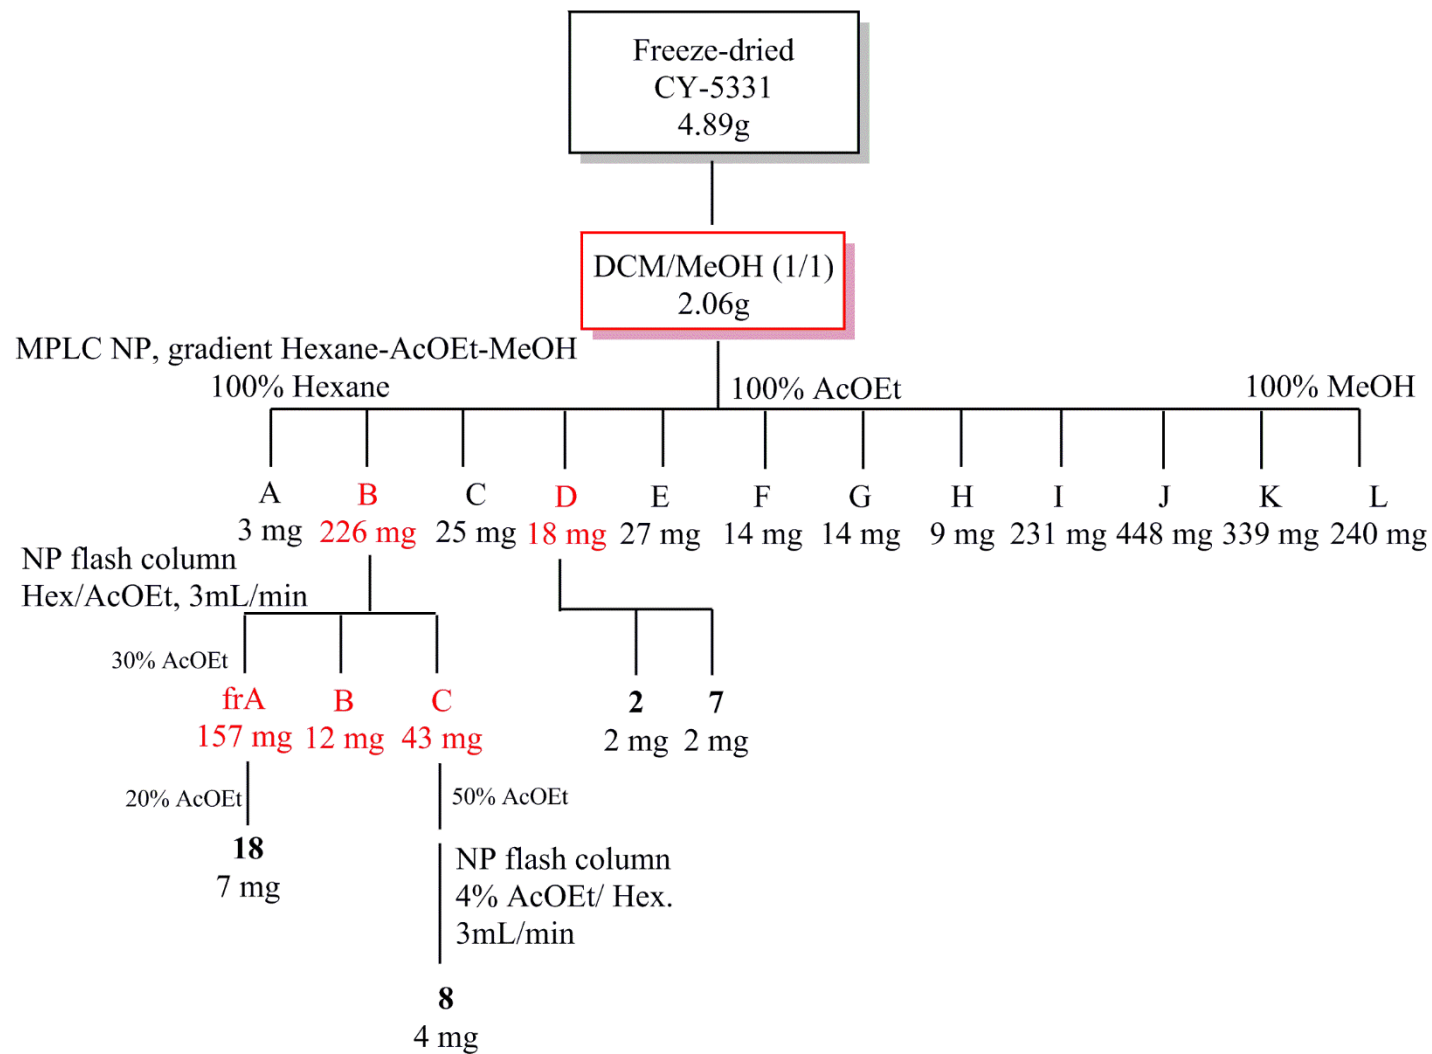

Figure S22.  $^1\text{H}$  NMR spectrum of **18** (500 MHz,  $\text{CDCl}_3$ ).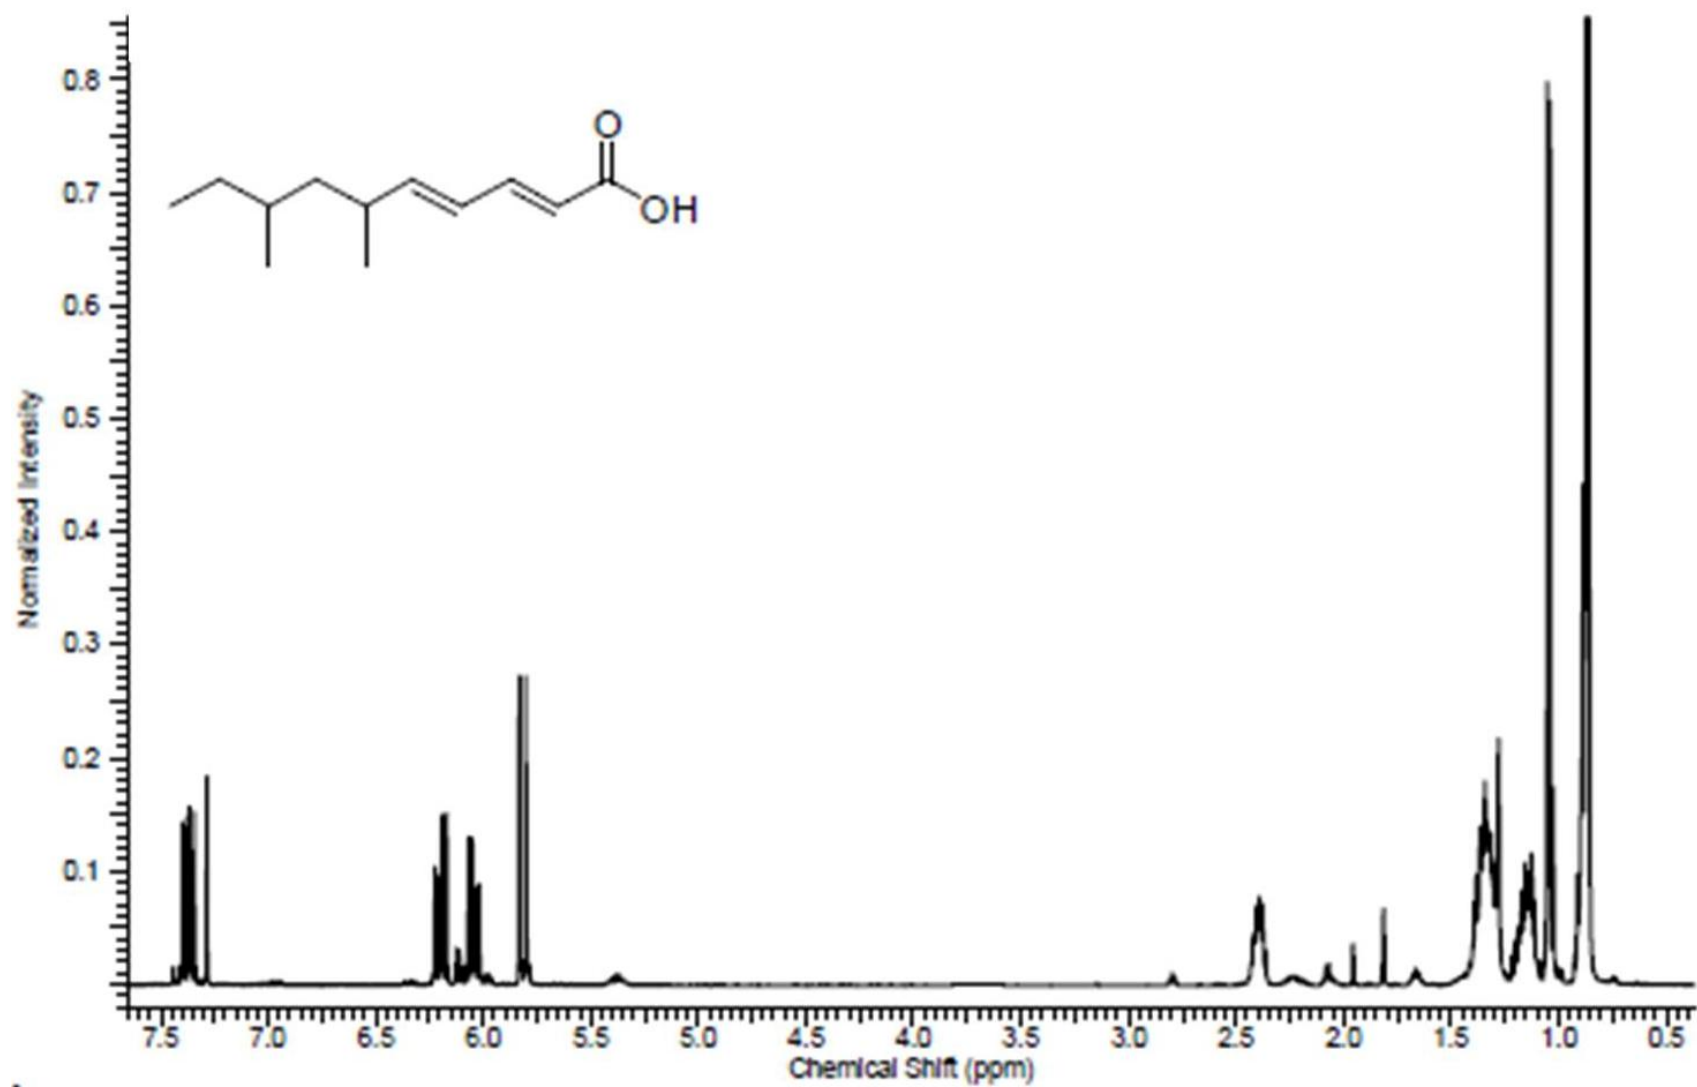

**Figure S23.**  $^{13}\text{C}$  and DEPT NMR spectra of **18** (125 MHz,  $\text{CDCl}_3$ ).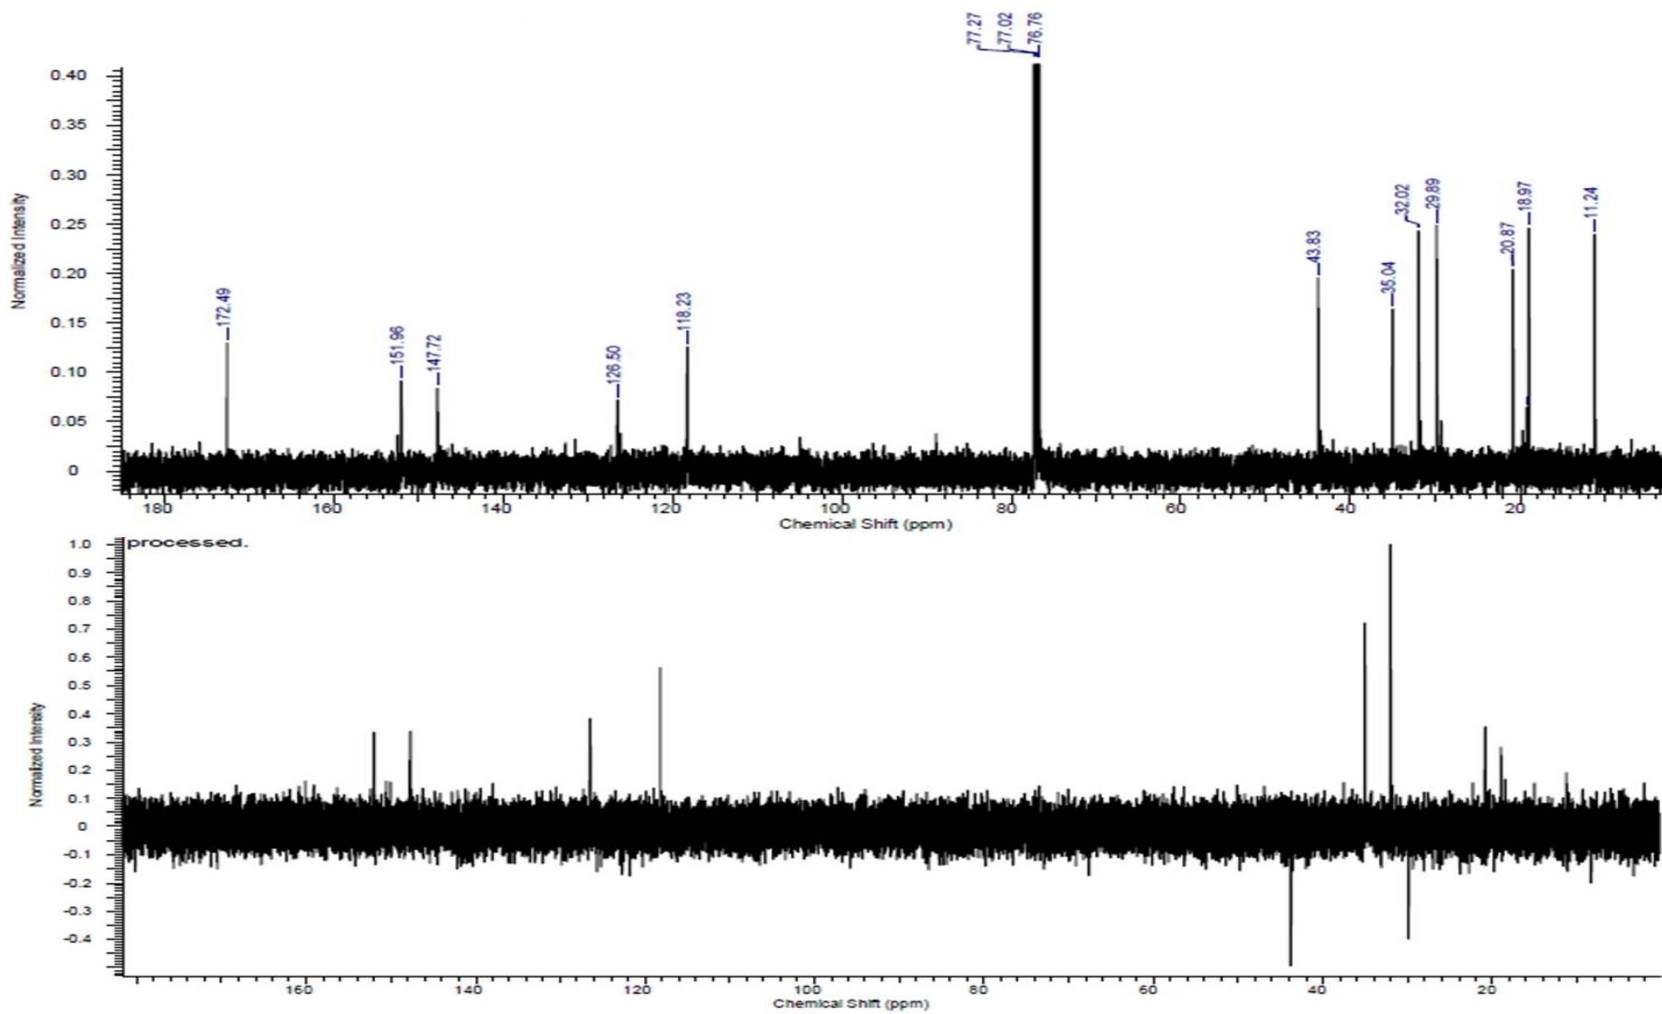



Figure S24. COSY spectrum of **18** (500 MHz,  $\text{CDCl}_3$ ).

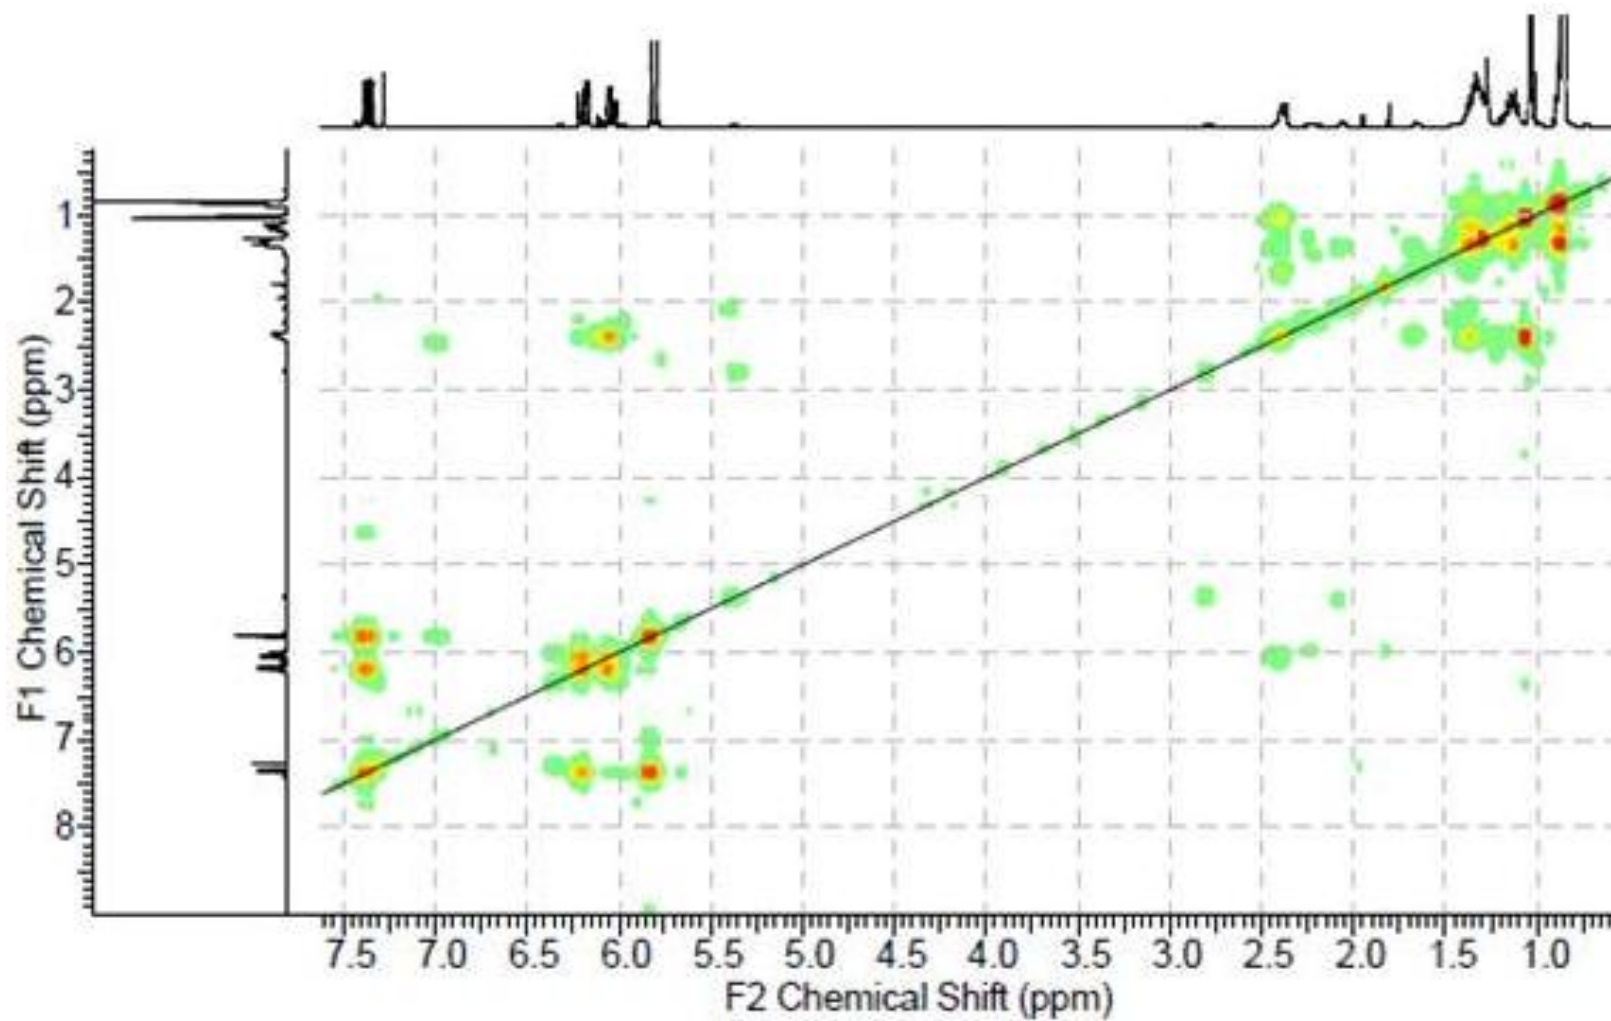

Figure S25. HSQC spectrum of **18** (500 MHz,  $\text{CDCl}_3$ ).

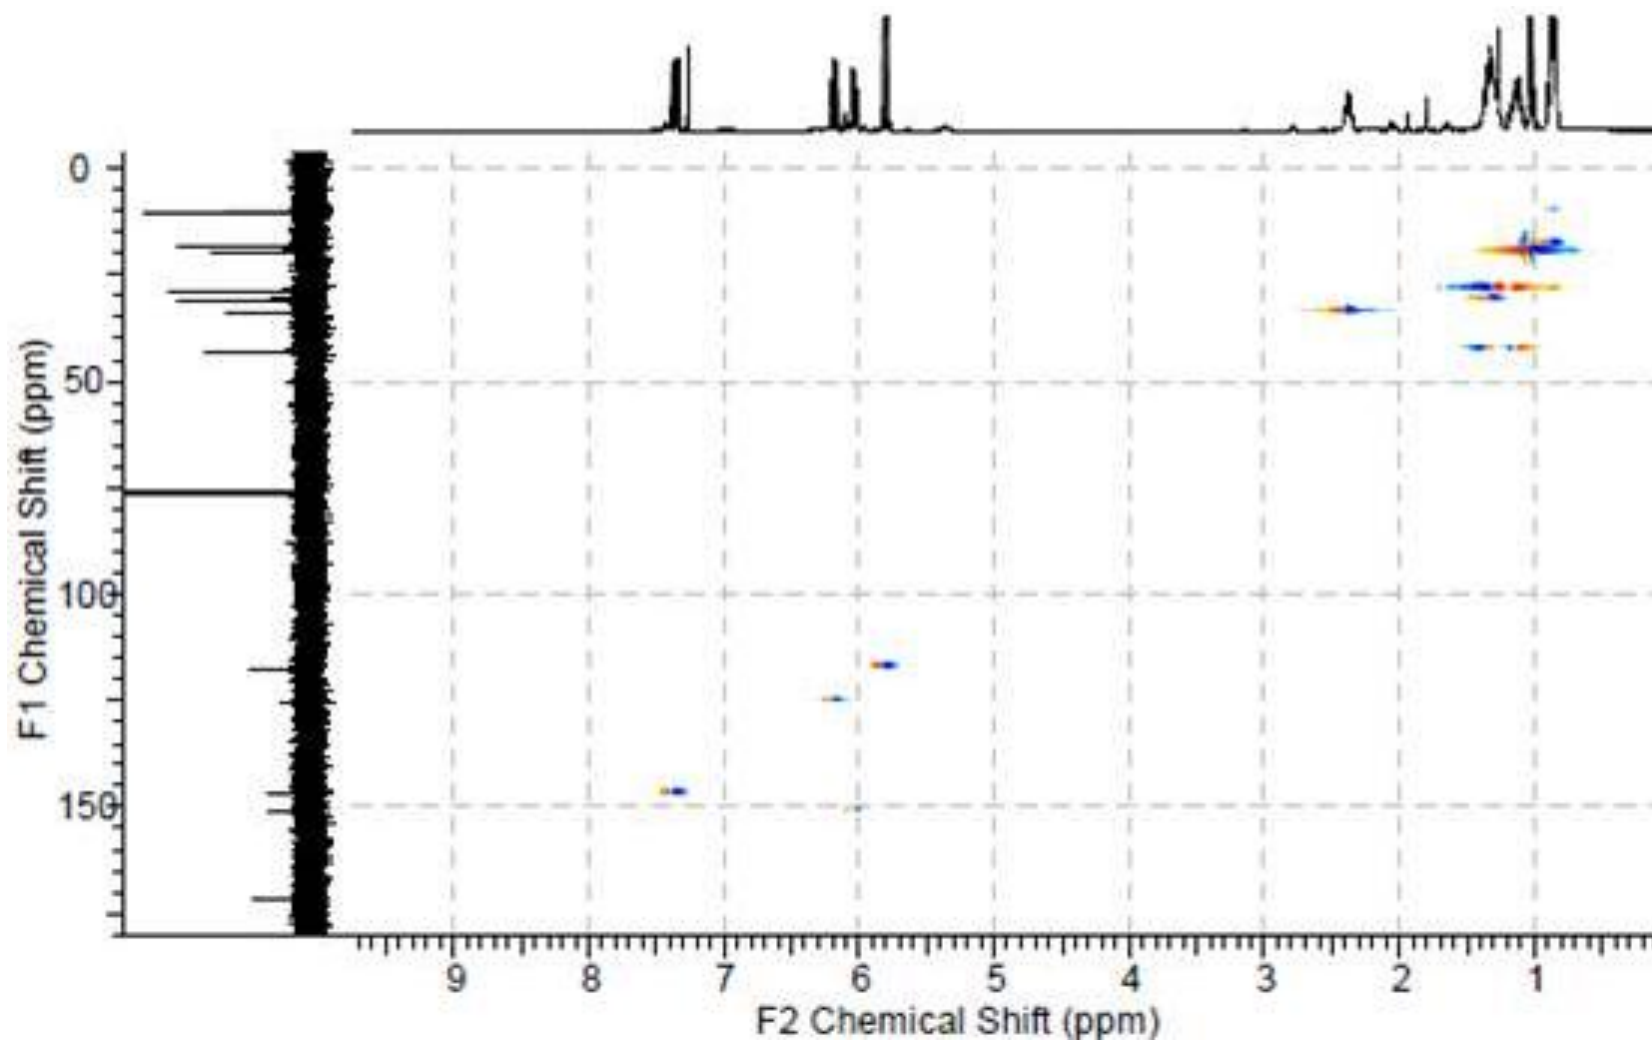

Figure S26. HMBC spectrum of **18** (500 MHz, CDCl<sub>3</sub>).

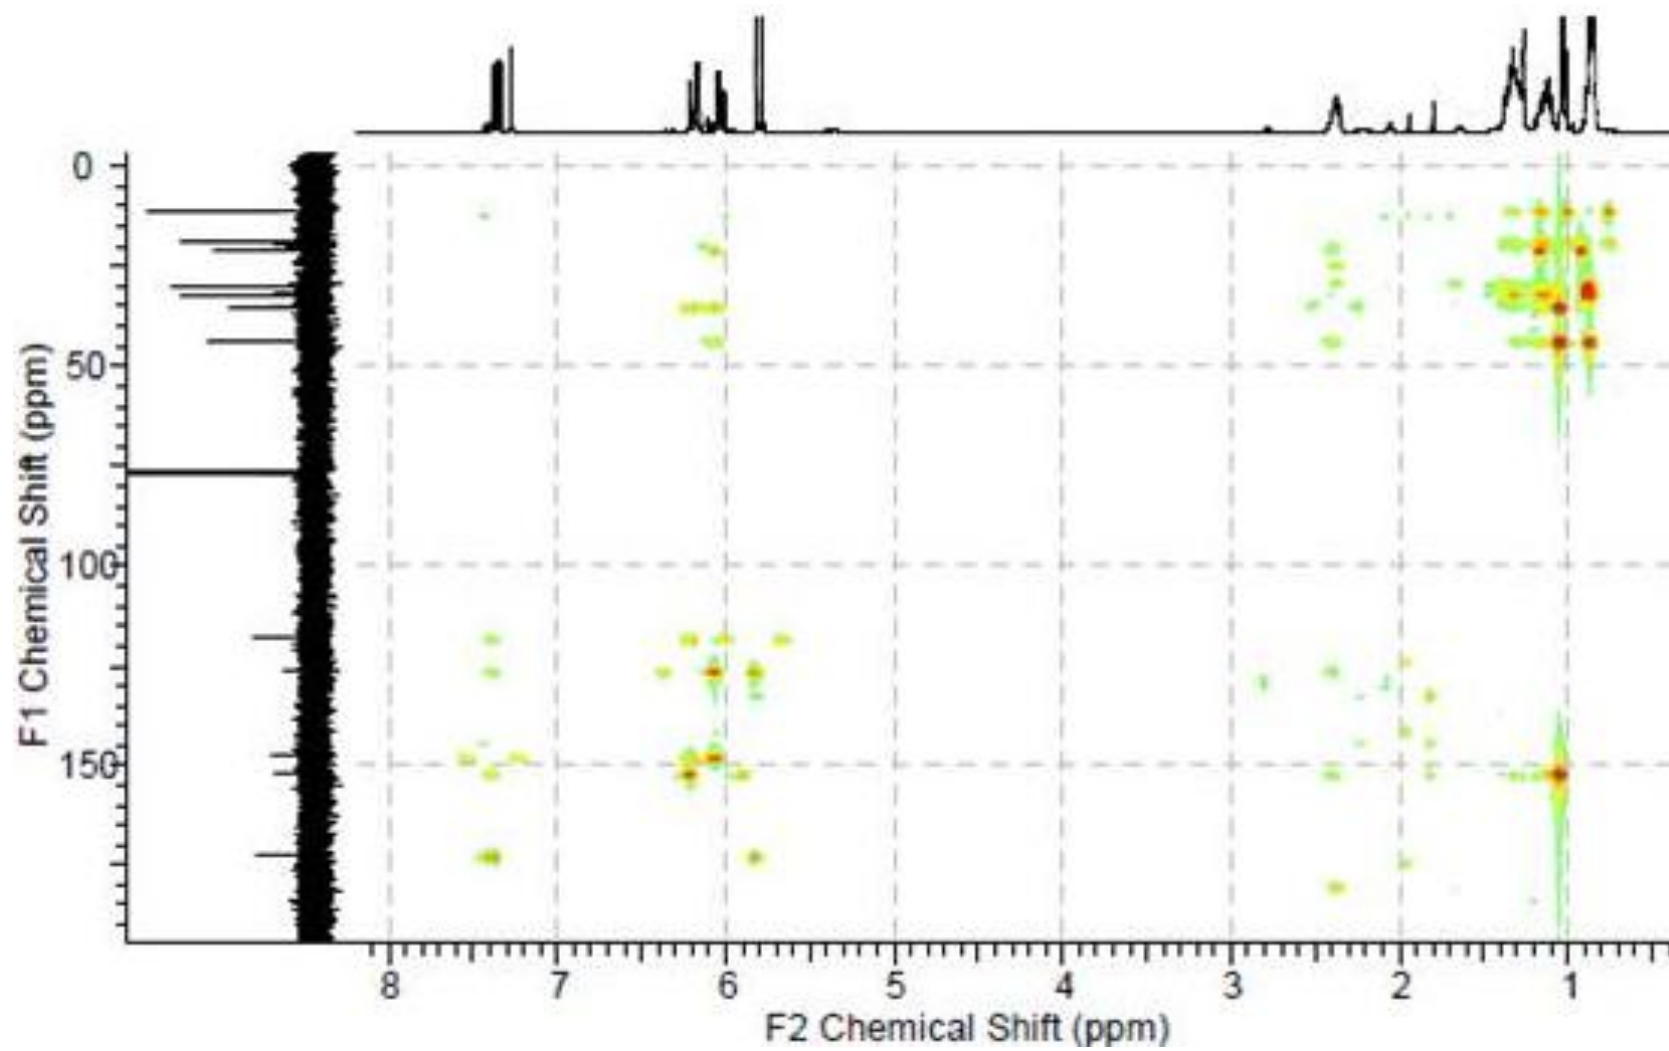

Supplement: marinedrugs-11-05036-s001.pdf [file marinedrugs-11-05036-s001.pdf]
